# Supplementary material for: The roles of different Bacteroides uniformis strains in alleviating DSS-induced ulcerative colitis and related functional genes
Source: Royal Society of Chemistry journal article supplement (doi:10.1039/d3fo04863b), 2024-01-01
Supplement: d3fo04863b1.pdf [file d3fo04863b1.pdf]

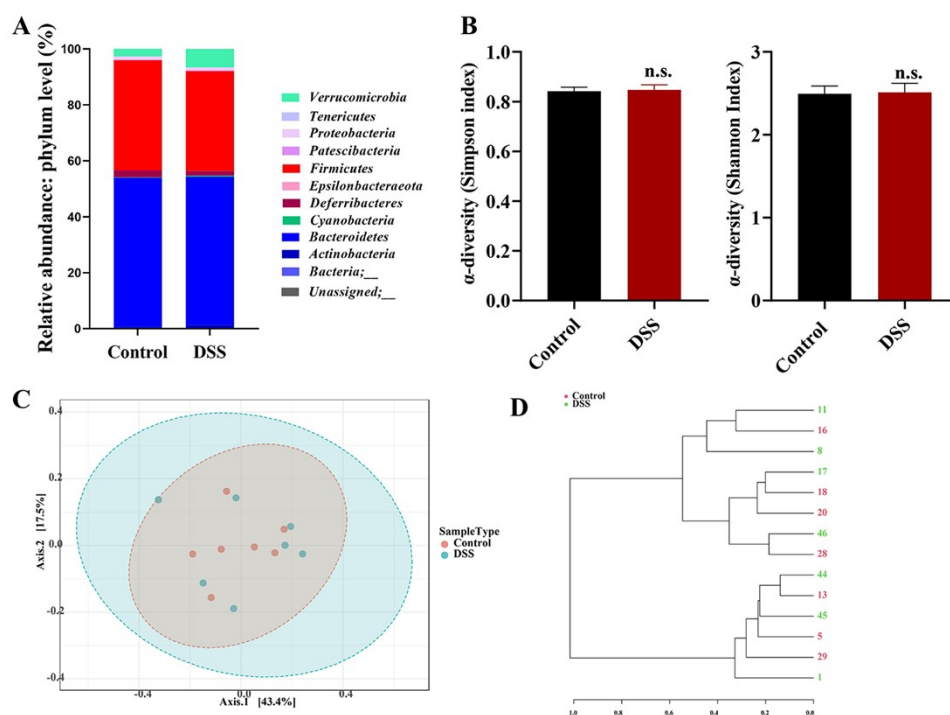

### Supplementary Figure 1 Intestinal microflora structure of mice before experiment

Note: (A) Microbial distribution (phylum level); (B) Alpha-diversity; (C) Principal coordinate analysis; (D) Horizontal structure cluster analysis.

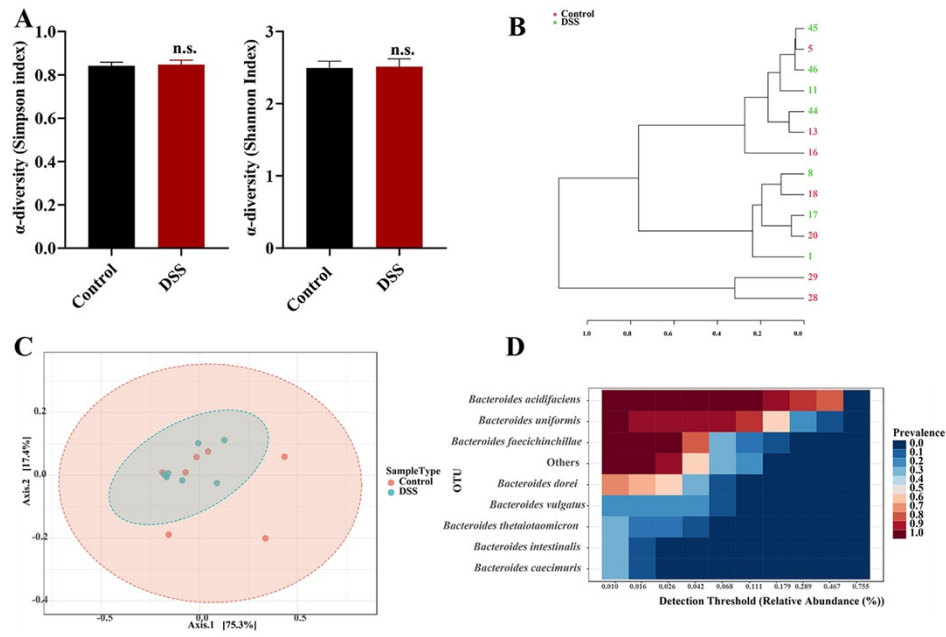

**Supplementary Figure 2 Structure of *Bacteroides* species level of mice before experiment**

Note: (A) Alpha-diversity; (B) Horizontal structure cluster analysis; (C) Principal coordinate analysis; (D) Core *Bacteroides* species.

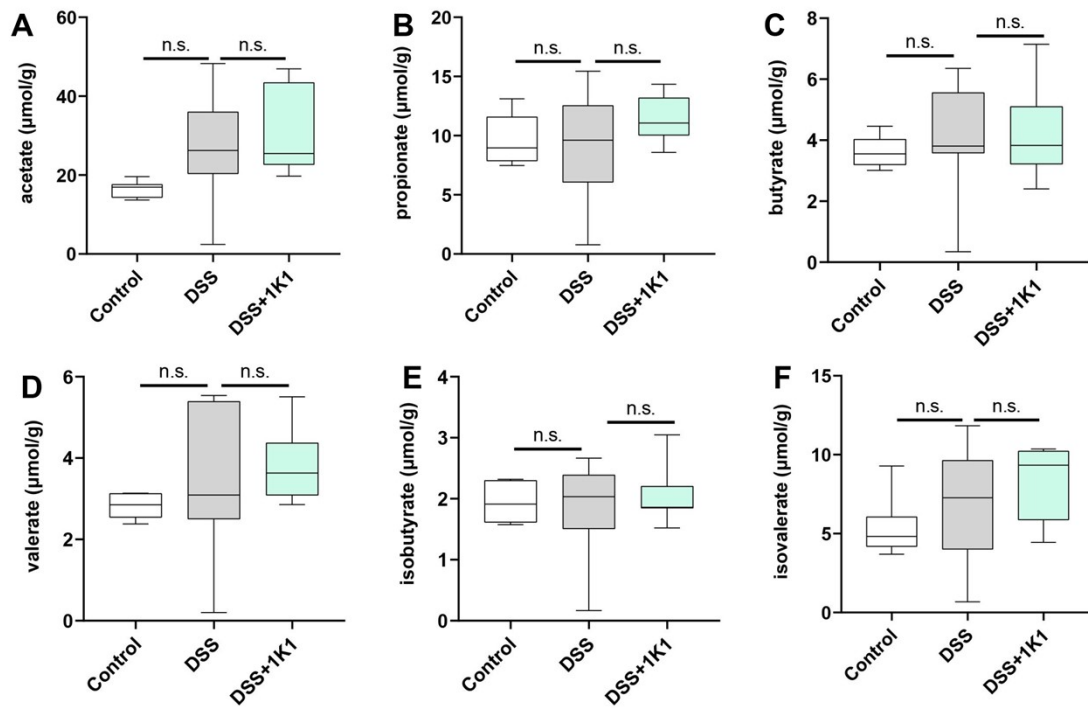

Supplementary Figure 3. Effects of *B. uniformis* 1K1 on the concentrations of short-chain fatty acids (SCFAs)

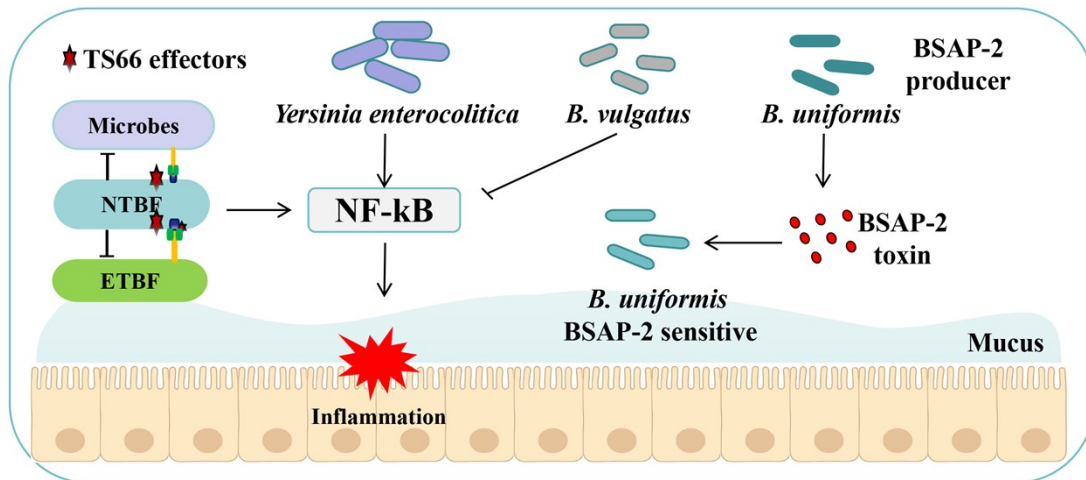

#### Supplementary Figure 4. The interaction between *Bacteroides* strains and other microbes

Note: NTBF, non-toxigenic *B. fragilis*; ETBF, enterotoxigenic *B. fragilis*.

*Bacteroides* can affect other *Bacteroides* as well as microorganisms through a variety of complex pathways. Typically, *B. vulgatus* can inhibit the *Y. enterocolitica*-induced NF-kappaB activation and IL-8 production (Frick et al. doi:10.1128/IAI.00119-07). *B. uniformis* can secrete membrane attack complex/perforin toxins (BSAP-2) for intraspecies killing, especially the *B. uniformis* BSAP-2 sensitive strain (García-Bayona and Laurie. doi:10.1126/science.aat2456). Besides, type VI secretion systems (T6SSs) are a type of system that can realize the interspecific killing of *B. fragilis*. TS66 is a multiprotein complex that has been shown to inhibit or kill prokaryotic or eukaryotic cells. The toxic effector enters the target cell directly through the contractile bacteriophage tail T6SS to exert its inhibitory effect (García-Bayona and Laurie. doi:10.1126/science.aat2456). Therefore, the genus of *Bacteroides* is a complex and changeable system, which is easily affected by multiple external and internal factors.

**Supplementary Table1. Information about the origin of the fecal samples**

| <b>Sample Number</b> | <b>Region</b>        | <b>Sample type</b> | <b>Age</b> | <b>Sex</b> |
|----------------------|----------------------|--------------------|------------|------------|
| BJ10                 | Beijing, China       | Faeces             | 55         | Woman      |
| BJ37                 | Beijing, China       | Faeces             | 61         | Woman      |
| BJ16                 | Beijing, China       | Faeces             | 34         | Man        |
| BJ2                  | Beijing, China       | Faeces             | 55         | Woman      |
| BJ20                 | Beijing, China       | Faeces             | 61         | Man        |
| BJ55                 | Beijing, China       | Faeces             | 47         | Woman      |
| BJ56                 | Beijing, China       | Faeces             | 47         | Man        |
| BJ5                  | Beijing, China       | Faeces             | 44         | Man        |
| BJ26                 | Beijing, China       | Faeces             | 31         | Woman      |
| BJ1                  | Beijing, China       | Faeces             | 52         | Man        |
| AHBZ18               | Bozhou, Anhui, China | Faeces             | 63         | Woman      |
| AHBZ17               | Bozhou, Anhui, China | Faeces             | 75         | Woman      |
| AHBZ32               | Bozhou, Anhui, China | Faeces             | 2          | Man        |
| AHBZ34               | Bozhou, Anhui, China | Faeces             | 52         | Man        |
| AHBZ33               | Bozhou, Anhui, China | Faeces             | 46         | Woman      |
| AHBZ8                | Bozhou, Anhui, China | Faeces             | 56         | Woman      |
| AHBZ6                | Bozhou, Anhui, China | Faeces             | 53         | Man        |
| FTJS35               | Tianjin, China       | Faeces             | 56         | Man        |
| FTJS22               | Tianjin, China       | Faeces             | 56         | Man        |
| FTJS15               | Tianjin, China       | Faeces             | 3          | Woman      |
| FTJS7                | Tianjin, China       | Faeces             | 50         | Man        |
| FTJS16               | Tianjin, China       | Faeces             | 5          | Woman      |
| FTJS25               | Tianjin, China       | Faeces             | 56         | Woman      |
| FTJS21               | Tianjin, China       | Faeces             | 3          | Woman      |
| FTJS32               | Tianjin, China       | Faeces             | 55         | Man        |
| FTJS12               | Tianjin, China       | Faeces             | 32         | Woman      |
| JSWX101              | Wuxi, Jiangsu, China | Faeces             | 47         | Man        |

|         |                        |        |    |       |
|---------|------------------------|--------|----|-------|
| JSWX97  | Wuxi, Jiangsu, China   | Faeces | 48 | Woman |
| JSWX106 | Wuxi, Jiangsu, China   | Faeces | 25 | Man   |
| JSWX99  | Wuxi, Jiangsu, China   | Faeces | 37 | Woman |
| JSWX104 | Wuxi, Jiangsu, China   | Faeces | 49 | Man   |
| JSWX108 | Wuxi, Jiangsu, China   | Faeces | 43 | Woman |
| JSWX103 | Wuxi, Jiangsu, China   | Faeces | 49 | Woman |
| JSWX96  | Wuxi, Jiangsu, China   | Faeces | 47 | Woman |
| JSWX98  | Wuxi, Jiangsu, China   | Faeces | 11 | Woman |
| JSWX100 | Wuxi, Jiangsu, China   | Faeces | 48 | Man   |
| GSZY17  | Zhangye, Gansu, China  | Faeces | 9  | Man   |
| GSZY28  | Zhangye, Gansu, China  | Faeces | 10 | Man   |
| GSZY48  | Zhangye, Gansu, China  | Faeces | 9  | Man   |
| GSZY37  | Zhangye, Gansu, China  | Faeces | 10 | Woman |
| GSZY52  | Zhangye, Gansu, China  | Faeces | 13 | Woman |
| GSZY54  | Zhangye, Gansu, China  | Faeces | 13 | Man   |
| GSZY43  | Zhangye, Gansu, China  | Faeces | 11 | Man   |
| GSZY29  | Zhangye, Gansu, China  | Faeces | 8  | Man   |
| GSZY30  | Zhangye, Gansu, China  | Faeces | 8  | Man   |
| GSZY49  | Zhangye, Gansu, China  | Faeces | 13 | Man   |
| JLHD25  | Huadian, Jilin, China  | Faeces | 61 | Man   |
| JLHD33  | Huadian, Jilin, China  | Faeces | 60 | Woman |
| JLHD26  | Huadian, Jilin, China  | Faeces | 53 | Man   |
| JLHD51  | Huadian, Jilin, China  | Faeces | 61 | Man   |
| JLHD39  | Huadian, Jilin, China  | Faeces | 8  | Man   |
| JLHD44  | Huadian, Jilin, China  | Faeces | 63 | Woman |
| JLHD56  | Huadian, Jilin, China  | Faeces | -- | --    |
| GSYC56  | Yinchuan, Gansu, China | Faeces | 16 | Man   |
| GSYC51  | Yinchuan, Gansu, China | Faeces | 18 | Man   |
| GSYC48  | Yinchuan, Gansu, China | Faeces | -- | --    |

|        |                        |        |    |       |
|--------|------------------------|--------|----|-------|
| GSYC89 | Yinchuan, Gansu, China | Faeces | 17 | Woman |
| GSYC28 | Yinchuan, Gansu, China | Faeces | 21 | Man   |
| GSYC70 | Yinchuan, Gansu, China | Faeces | 17 | Man   |
| GSYC27 | Yinchuan, Gansu, China | Faeces | 54 | Woman |
| GSYC36 | Yinchuan, Gansu, China | Faeces | 56 | Man   |
| GSYC73 | Yinchuan, Gansu, China | Faeces | 17 | Man   |
| GSYC47 | Yinchuan, Gansu, China | Faeces | 75 | Woman |

---

**Supplementary Table 2. Information of the CAZy family unique to the 1K1 genome**

| Caazy family | Family known-activities                                                                                                                                                                                                                                                                                                                                                                                                                                                                                                                                                                                                                                                                                                                                                                                                                                                                                                                                                                                                                                                                                                                                                                                                                                                                                                                                   |
|--------------|-----------------------------------------------------------------------------------------------------------------------------------------------------------------------------------------------------------------------------------------------------------------------------------------------------------------------------------------------------------------------------------------------------------------------------------------------------------------------------------------------------------------------------------------------------------------------------------------------------------------------------------------------------------------------------------------------------------------------------------------------------------------------------------------------------------------------------------------------------------------------------------------------------------------------------------------------------------------------------------------------------------------------------------------------------------------------------------------------------------------------------------------------------------------------------------------------------------------------------------------------------------------------------------------------------------------------------------------------------------|
| CBM38        | The inulin-binding function has been demonstrated in the case of the cycloinulo-oligosaccharide fructanotransferase from <i>Paenibacillus macerans</i> ( <i>Bacillus macerans</i> ).                                                                                                                                                                                                                                                                                                                                                                                                                                                                                                                                                                                                                                                                                                                                                                                                                                                                                                                                                                                                                                                                                                                                                                      |
| CBM32        | Binding to galactose and lactose has been demonstrated for the module of <i>Micromonospora viridifaciens</i> sialidase. Binding to polygalacturonic acid has been shown for a <i>Yersinia</i> member. Binding to LacNAc ( $\beta$ -D-galactosyl-1,4- $\beta$ -D-N-acetylglucosamine) has been shown for an N-acetylglucosaminidase from <i>Clostridium perfringens</i> .                                                                                                                                                                                                                                                                                                                                                                                                                                                                                                                                                                                                                                                                                                                                                                                                                                                                                                                                                                                  |
| CE4          | Acetyl xylan esterase; chitin deacetylase; chitooligosaccharide deacetylase; peptidoglycan GlcNAc deacetylase; peptidoglycan N-acetylmuramic acid deacetylase.                                                                                                                                                                                                                                                                                                                                                                                                                                                                                                                                                                                                                                                                                                                                                                                                                                                                                                                                                                                                                                                                                                                                                                                            |
| GH109        | $\alpha$ -N-acetylgalactosaminidase; $\beta$ -N-acetylhexosaminidase                                                                                                                                                                                                                                                                                                                                                                                                                                                                                                                                                                                                                                                                                                                                                                                                                                                                                                                                                                                                                                                                                                                                                                                                                                                                                      |
| GH125        | exo- $\alpha$ -1,6-mannosidase                                                                                                                                                                                                                                                                                                                                                                                                                                                                                                                                                                                                                                                                                                                                                                                                                                                                                                                                                                                                                                                                                                                                                                                                                                                                                                                            |
| GH13_36      | [retaining] $\alpha$ -amylase; [retaining] maltogenic $\alpha$ -amylase; [retaining] neopullulanase; [retaining] cyclomaltodextrinase                                                                                                                                                                                                                                                                                                                                                                                                                                                                                                                                                                                                                                                                                                                                                                                                                                                                                                                                                                                                                                                                                                                                                                                                                     |
| GH32         | invertase; endo-inulinase; $\beta$ -2,6-fructan 6-levanbiohydrolase; endo-levanase; exo-inulinase; fructan $\beta$ -(2,1)-fructosidase/1-exohydrolase; fructan $\beta$ -(2,6)-fructosidase/6-exohydrolase; sucrose:sucrose 1-fructosyltransferase; fructan:fructan 1-fructosyltransferase; sucrose:fructan 6-fructosyltransferase; fructan:fructan 6G-fructosyltransferase; levan fructosyltransferase; [retaining] sucrose:sucrose 6-fructosyltransferase (6-SST); cycloinulo-oligosaccharide fructanotransferase                                                                                                                                                                                                                                                                                                                                                                                                                                                                                                                                                                                                                                                                                                                                                                                                                                        |
| GH43_28      | $\alpha$ -1,2-L-arabinofuranosidase; $\alpha$ -1,3-L-arabinofuranosidase; exo- $\alpha$ -1,5-L-arabinofuranosidase; exo- $\beta$ -1,3-galactanase; $\beta$ -D-galactofuranosidase; xylan $\beta$ -1,4-xylosidase; $\alpha$ -L-arabinofuranosidase; $\beta$ -1,3-xylosidase; endo- $\beta$ -1,4-xylanase; [invertig] endo- $\alpha$ -1,5-L-arabinanase                                                                                                                                                                                                                                                                                                                                                                                                                                                                                                                                                                                                                                                                                                                                                                                                                                                                                                                                                                                                     |
| GH92         | mannosyl-oligosaccharide $\alpha$ -1,2-mannosidase; mannosyl-oligosaccharide $\alpha$ -1,3-mannosidase; mannosyl-oligosaccharide $\alpha$ -1,6-mannosidase; $\alpha$ -mannosidase; $\alpha$ -1,2-mannosidase; $\alpha$ -1,4-mannosidase; mannosyl-1-phosphodiester $\alpha$ -1, P-mannosidase                                                                                                                                                                                                                                                                                                                                                                                                                                                                                                                                                                                                                                                                                                                                                                                                                                                                                                                                                                                                                                                             |
| GT4          | sucrose synthase; sucrose-phosphate synthase; $\alpha$ -glucosyltransferase; lipopolysaccharide N-acetylglucosaminyltransferase; phosphatidylinositol $\alpha$ -mannosyltransferase; GDP-Man: Man1GlcNAc2-PP-dolichol $\alpha$ -1,3-mannosyltransferase; GDP-Man: Man3GlcNAc2-PP-dolichol/Man4GlcNAc2-PP-dolichol $\alpha$ -1,2-mannosyltransferase; digalactosyldiacylglycerol synthase; 1,2-diacylglycerol 3-glucosyltransferase; diglucosyl diacylglycerol synthase; trehalose phosphorylase; NDP-Glc: $\alpha$ -glucose $\alpha$ -glucosyltransferase / $\alpha,\alpha$ -trehalose synthase; GDP-Man: Man2GlcNAc2-PP-dolichol $\alpha$ -1,6-mannosyltransferase; UDP-GlcNAc: 2-deoxystreptamine $\alpha$ -N-acetylglucosaminyltransferase; UDP-GlcNAc: ribostamycin $\alpha$ -N-acetylglucosaminyltransferase; UDP-Gal $\alpha$ -galactosyltransferase; UDP-Xyl $\alpha$ -xylosyltransferase; UDP-GlcA $\alpha$ -glucuronyltransferase; UDP-Glc $\alpha$ -glucosyltransferase; UDP-GalNAc: GalNAc-PP-Und $\alpha$ -1,3-N-acetylgalactosaminyltransferase; UDP-GalNAc: N,N'-diacetylbaucillosaminyl-PP-Und $\alpha$ -1,3-N-acetylgalactosaminyltransferase; ADP-dependent $\alpha$ -maltose-1-phosphate synthase; [retaining] UDP-GlcNAc: polypeptide $\alpha$ -N-acetylglucosaminyltransferase; UDP-GlcNAc: $\alpha$ -N-acetylglucosaminyltransferase |
| GT8          | lipopolysaccharide $\alpha$ -1,3-galactosyltransferase; UDP-Glc: (glucosyl)lipopolysaccharide $\alpha$ -1,2-glucosyltransferase; lipopolysaccharide glucosyltransferase 1 glycogenin glucosyltransferase; inositol 1- $\alpha$ -galactosyltransferase (galactinol synthase) ; homogalacturonan $\alpha$ -1,4-galacturonosyltransferase; UDP-GlcA: xylan $\alpha$ -glucuronyltransferase; UDP-Gal:glucoside $\alpha$ -1,3-galactosyltransferase                                                                                                                                                                                                                                                                                                                                                                                                                                                                                                                                                                                                                                                                                                                                                                                                                                                                                                            |

**Supplementary Table 3. COG categories present in 1K1 only**



| <b>COG number</b> | <b>Functional description</b>                                                                       | <b>Functional class</b> |
|-------------------|-----------------------------------------------------------------------------------------------------|-------------------------|
| COG0286           | Type I restriction-modification system methyltransferase subunit                                    | [V]                     |
| COG0610           | Type I site-specific restriction-modification system, R (restriction) subunit and related helicases | [V]                     |
| COG0662           | Mannose-6-phosphate isomerase                                                                       | [G]                     |
| COG1432           | Uncharacterized conserved protein                                                                   | [S]                     |
| COG3344           | Retron-type reverse transcriptase                                                                   | [L]                     |
| COG3666           | Transposase and inactivated derivatives                                                             | [L]                     |
| COG4734           | Antirestriction protein                                                                             | [R]                     |
| NOG114077         | Ragb/Susd domain protein                                                                            |                         |
| NOG114350         | Integrase                                                                                           | [S]                     |
| NOG115567         | Mobilization protein                                                                                | [S]                     |
| NOG39540          | Uba/Thif-Type NAD/FAD binding protein                                                               | [R]                     |
| NOG42453          | Protein found in conjugate transposon                                                               | [S]                     |
| NOG42679          | Protein found in conjugate transposon                                                               | [S]                     |
| NOG43858          | Protein found in conjugate transposon                                                               | [S]                     |
| NOG44942          | Protein found in conjugate transposon TraI                                                          | [S]                     |
| NOG45139          | Protein found in conjugate transposon TraK                                                          | [S]                     |
| NOG87058          | Protein found in conjugate transposon                                                               | [D]                     |

**Supplementary Table 4. The database of comprehensive research on antibiotics (CARD) of *B. uniformis* 1K1**

| ARO_id      | ShortName | AMR Gene Family                                                                                                             | Drug Class                                                                    | Resistance Mechanism          | FNMHLBE1K1 |
|-------------|-----------|-----------------------------------------------------------------------------------------------------------------------------|-------------------------------------------------------------------------------|-------------------------------|------------|
| ARO:3000833 | evgS      | major facilitator superfamily (MFS) antibiotic efflux pump;resistance-nodulation-cell division (RND) antibiotic efflux pump | fluoroquinolone antibiotic;macrolide antibiotic;penam;tetracycline antibiotic | antibiotic efflux             | 5          |
| ARO:3003746 | optrA     | Miscellaneous ABC-F subfamily ATP-binding cassette ribosomal protection proteins                                            | oxazolidinone antibiotic;phenicol antibiotic                                  | antibiotic target protection  | 2          |
| ARO:3002865 | dfrC      | trimethoprim resistant dihydrofolate reductase dfr                                                                          | diaminopyrimidine antibiotic                                                  | antibiotic target replacement | 1          |
| ARO:3000191 | tet(Q)    | tetracycline-resistant ribosomal protection protein                                                                         | tetracycline antibiotic                                                       | antibiotic target protection  | 2          |
| ARO:3005008 | TxR       | ATP-binding cassette (ABC) antibiotic efflux pump                                                                           | tetracycline antibiotic                                                       | antibiotic efflux             | 11         |
| ARO:3003066 | smeR      | resistance-nodulation-cell division (RND) antibiotic efflux pump                                                            | aminoglycoside antibiotic;cephalosporin;cephamycin;penam                      | antibiotic efflux             | 1          |
| ARO:3002987 | bcrA      | ATP-binding cassette (ABC) antibiotic efflux pump                                                                           | peptide antibiotic                                                            | antibiotic efflux             | 3          |
| ARO:3005090 | RanB      | ATP-binding cassette (ABC) antibiotic efflux pump                                                                           | aminoglycoside antibiotic;macrolide antibiotic                                | antibiotic efflux             | 1          |
| ARO:3005091 | RanA      | ATP-binding cassette (ABC) antibiotic efflux pump                                                                           | aminoglycoside antibiotic;macrolide antibiotic                                | antibiotic efflux             | 2          |

|             |                 |                                                                  |                                                                                                                                                                                                                    |                               |   |
|-------------|-----------------|------------------------------------------------------------------|--------------------------------------------------------------------------------------------------------------------------------------------------------------------------------------------------------------------|-------------------------------|---|
| ARO:3004361 | sul4            | sulfonamide resistant sul                                        | sulfonamide antibiotic                                                                                                                                                                                             | antibiotic target replacement | 1 |
| ARO:3000535 | macB            | ATP-binding cassette (ABC) antibiotic efflux pump                | macrolide antibiotic                                                                                                                                                                                               | antibiotic efflux             | 9 |
| ARO:3004253 | vanU_in_vanG_cl | glycopeptide resistance gene cluster;vanU                        | glycopeptide antibiotic                                                                                                                                                                                            | antibiotic target alteration  |   |
| ARO:3007050 | mreA            | major facilitator superfamily (MFS) antibiotic efflux pump       | macrolide antibiotic                                                                                                                                                                                               | antibiotic efflux             | 1 |
| ARO:3000326 | ErmE            | Erm 23S ribosomal RNA methyltransferase                          | lincosamide antibiotic;macrolide antibiotic;streptogramin A antibiotic;streptogramin B antibiotic;streptogramin antibiotic                                                                                         | antibiotic target alteration  | 1 |
| ARO:3002844 | vatE            | streptogramin vat acetyltransferase                              | streptogramin A antibiotic;streptogramin antibiotic                                                                                                                                                                | antibiotic inactivation       | 1 |
| ARO:3002941 | vanS_in_vanO_cl | glycopeptide resistance gene cluster;vanS                        | glycopeptide antibiotic                                                                                                                                                                                            | antibiotic target alteration  | 1 |
| ARO:3000838 | arlR            | major facilitator superfamily (MFS) antibiotic efflux pump       | disinfecting agents and antiseptics;fluoroquinolone antibiotic                                                                                                                                                     | antibiotic efflux             | 2 |
| ARO:3005040 | YajC            | resistance-nodulation-cell division (RND) antibiotic efflux pump | cephalosporin;disinfecting agents and antiseptics;fluoroquinolone antibiotic;glycopeptide antibiotic;glycylcycline;oxazolidinone antibiotic;penam;phenicol antibiotic;rifamycin antibiotic;tetracycline antibiotic | antibiotic efflux             | 1 |
| ARO:3003060 | tsnR            | non-erm 23S ribosomal RNA methyltransferase (A1067)              | peptide antibiotic                                                                                                                                                                                                 | antibiotic target alteration  | 1 |

|             |                   |                                                                                  |                                                                                              |                              |   |
|-------------|-------------------|----------------------------------------------------------------------------------|----------------------------------------------------------------------------------------------|------------------------------|---|
| ARO:3003744 | vatF              | streptogramin vat acetyltransferase                                              | streptogramin A antibiotic;streptogramin antibiotic                                          | antibiotic inactivation      | 1 |
| ARO:3004649 | cfr(B)            | Cfr 23S ribosomal RNA methyltransferase                                          | lincosamide antibiotic;oxazolidinone antibiotic;phenicol antibiotic;streptogramin antibiotic | antibiotic target alteration | 1 |
| ARO:3003577 | ugd               | pmr phosphoethanolamine transferase                                              | peptide antibiotic                                                                           | antibiotic target alteration | 1 |
| ARO:3002999 | CblA-1            | CblA beta-lactamase                                                              | cephalosporin                                                                                | antibiotic inactivation      | 1 |
| ARO:3000804 | MexF              | resistance-nodulation-cell division (RND) antibiotic efflux pump                 | diaminopyrimidine antibiotic;fluoroquinolone antibiotic;phenicol antibiotic                  | antibiotic efflux            | 1 |
| ARO:3000789 | mdsA              | resistance-nodulation-cell division (RND) antibiotic efflux pump                 | carbapenem;cephalosporin;cephamycin;monobactam;penam;penem;phenicol antibiotic               | antibiotic efflux            | 1 |
| ARO:3000521 | Saur_mup<br>A_MUP | antibiotic-resistant isoleucyl-tRNA synthetase (ileS)                            | mupirocin-like antibiotic                                                                    | antibiotic target alteration | 1 |
| ARO:3002881 | lmrC              | Miscellaneous ABC-F subfamily ATP-binding cassette ribosomal protection proteins | lincosamide antibiotic                                                                       | antibiotic target protection | 1 |
| ARO:3000746 | mepR              | multidrug and toxic compound extrusion (MATE) transporter                        | glycylcycline;tetracycline antibiotic                                                        | antibiotic efflux            | 1 |
| ARO:3003048 | rosA              | major facilitator superfamily (MFS) antibiotic efflux pump                       | peptide antibiotic                                                                           | antibiotic efflux            | 1 |
| ARO:3003920 | pgpB              | lipid A phosphatase                                                              | peptide antibiotic                                                                           | antibiotic target            | 1 |

|             |                     |                                                                     |                                                                                                                                                                                                                                                                                                                                  |                                    |   |
|-------------|---------------------|---------------------------------------------------------------------|----------------------------------------------------------------------------------------------------------------------------------------------------------------------------------------------------------------------------------------------------------------------------------------------------------------------------------|------------------------------------|---|
|             |                     |                                                                     |                                                                                                                                                                                                                                                                                                                                  | alteration                         |   |
| ARO:3002925 | vanR_in_v<br>anF_cl | glycopeptide resistance gene cluster;vanR                           | glycopeptide antibiotic                                                                                                                                                                                                                                                                                                          | antibiotic<br>target<br>alteration | 2 |
| ARO:3002522 | novA                | ATP-binding cassette (ABC) antibiotic<br>efflux pump                | aminocoumarin antibiotic                                                                                                                                                                                                                                                                                                         | antibiotic<br>efflux               | 1 |
| ARO:3002840 | vatA                | streptogramin vat acetyltransferase                                 | streptogramin A antibiotic;streptogramin antibiotic                                                                                                                                                                                                                                                                              | antibiotic<br>inactivation         |   |
| ARO:3000783 | cmeA                | resistance-nodulation-cell division (RND)<br>antibiotic efflux pump | cephalosporin;fluoroquinolone antibiotic;fusidane antibiotic;macrolide<br>antibiotic                                                                                                                                                                                                                                             | antibiotic<br>efflux               | 4 |
| ARO:3000784 | cmeB                | resistance-nodulation-cell division (RND)<br>antibiotic efflux pump | cephalosporin;fluoroquinolone antibiotic;fusidane antibiotic;macrolide<br>antibiotic                                                                                                                                                                                                                                             | antibiotic<br>efflux               | 4 |
| ARO:3000379 | OprM                | resistance-nodulation-cell division (RND)<br>antibiotic efflux pump | aminocoumarin antibiotic;aminoglycoside<br>antibiotic;carbapenem;cephalosporin;cephamycin;diaminopyrimidine<br>antibiotic;disinfecting agents and antiseptics;fluoroquinolone<br>antibiotic;macrolide antibiotic;monobactam;penam;penem;peptide<br>antibiotic;phenicol antibiotic;sulfonamide antibiotic;tetracycline antibiotic | antibiotic<br>efflux               | 5 |
| ARO:3007104 | nimA                | nitroimidazole reductase                                            | nitroimidazole antibiotic                                                                                                                                                                                                                                                                                                        | antibiotic<br>inactivation         | 1 |
| ARO:3003005 | CfxA4               | CfxA beta-lactamase                                                 | cephamycin                                                                                                                                                                                                                                                                                                                       | antibiotic<br>inactivation         |   |
| ARO:3000839 | arlS                | major facilitator superfamily (MFS)<br>antibiotic efflux pump       | disinfecting agents and antiseptics;fluoroquinolone antibiotic                                                                                                                                                                                                                                                                   | antibiotic<br>efflux               |   |
| ARO:3000533 | macA                | ATP-binding cassette (ABC) antibiotic<br>efflux pump                | macrolide antibiotic                                                                                                                                                                                                                                                                                                             | antibiotic<br>efflux               | 1 |
| ARO:3003986 | TacA                | ATP-binding cassette (ABC) antibiotic                               | pleuromutilin antibiotic                                                                                                                                                                                                                                                                                                         | antibiotic                         | 2 |

|             |                 |                                                                  |                                                                                             |                              |   |
|-------------|-----------------|------------------------------------------------------------------|---------------------------------------------------------------------------------------------|------------------------------|---|
|             |                 | efflux pump                                                      |                                                                                             | efflux                       |   |
| ARO:3002841 | vatB            | streptogramin vat acetyltransferase                              | streptogramin A antibiotic;streptogramin antibiotic                                         | antibiotic inactivation      | 1 |
| ARO:3004047 | kdpD            | kdpDE                                                            | aminoglycoside antibiotic                                                                   | antibiotic efflux            | 1 |
| ARO:3002907 | vanE            | Van ligase;glycopeptide resistance gene cluster                  | glycopeptide antibiotic                                                                     | antibiotic target alteration | 1 |
| ARO:3003055 | smeD            | resistance-nodulation-cell division (RND) antibiotic efflux pump | fluoroquinolone antibiotic;macrolide antibiotic;phenicol antibiotic;tetracycline antibiotic | antibiotic efflux            | 1 |
| ARO:3003980 | tetA(58)        | major facilitator superfamily (MFS) antibiotic efflux pump       | tetracycline antibiotic                                                                     | antibiotic efflux            | 2 |
| ARO:3002947 | vanH_in_vanM_cl | glycopeptide resistance gene cluster;vanH                        | glycopeptide antibiotic                                                                     | antibiotic target alteration | 1 |
| ARO:3000795 | mdtE            | resistance-nodulation-cell division (RND) antibiotic efflux pump | fluoroquinolone antibiotic;macrolide antibiotic;penam                                       | antibiotic efflux            | 1 |
| ARO:3000790 | mdsB            | resistance-nodulation-cell division (RND) antibiotic efflux pump | carbapenem;cephalosporin;cephamycin;monobactam;penam;penem;phenicol antibiotic              | antibiotic efflux            | 1 |
| ARO:3002929 | vanR_in_vanN_cl | glycopeptide resistance gene cluster;vanR                        | glycopeptide antibiotic                                                                     | antibiotic target alteration | 1 |
| ARO:3002845 | vatH            | streptogramin vat acetyltransferase                              | streptogramin A antibiotic;streptogramin antibiotic                                         | antibiotic inactivation      | 1 |
| ARO:3002700 | cmlv            | chloramphenicol phosphotransferase                               | phenicol antibiotic                                                                         | antibiotic inactivation      | 1 |

|             |                     |                                                                     |                                                                                                                                    |                                    |   |
|-------------|---------------------|---------------------------------------------------------------------|------------------------------------------------------------------------------------------------------------------------------------|------------------------------------|---|
| ARO:3002942 | vanH_in_<br>vanA_cl | glycopeptide resistance gene cluster;vanH                           | glycopeptide antibiotic                                                                                                            | antibiotic<br>target<br>alteration | 2 |
| ARO:3003031 | MexW                | resistance-nodulation-cell division (RND)<br>antibiotic efflux pump | disinfecting agents and antiseptics;fluoroquinolone antibiotic;macrolide<br>antibiotic;phenicol antibiotic;tetracycline antibiotic | antibiotic<br>efflux               | 1 |
| ARO:3002986 | bacA                | undecaprenyl pyrophosphate related<br>proteins                      | peptide antibiotic                                                                                                                 | antibiotic<br>target<br>alteration | 1 |
| ARO:3003578 | PmrF                | pmr phosphoethanolamine transferase                                 | peptide antibiotic                                                                                                                 | antibiotic<br>target<br>alteration | 1 |
| ARO:3000498 | ErmF                | Erm 23S ribosomal RNA methyltransferase                             | lincosamide antibiotic;macrolide antibiotic;streptogramin A<br>antibiotic;streptogramin B antibiotic;streptogramin antibiotic      | antibiotic<br>target<br>alteration | 2 |
| ARO:3004451 | Afab_AC<br>T_CHL    | chloramphenicol acetyltransferase (CAT)                             | phenicol antibiotic                                                                                                                | antibiotic<br>inactivation         | 1 |
| ARO:3003835 | cdeA                | multidrug and toxic compound extrusion<br>(MATE) transporter        | disinfecting agents and antiseptics;fluoroquinolone antibiotic                                                                     | antibiotic<br>efflux               | 2 |
| ARO:3004077 | PmpM                | multidrug and toxic compound extrusion<br>(MATE) transporter        | aminoglycoside antibiotic;disinfecting agents and antiseptics;fluoroquinolone<br>antibiotic                                        | antibiotic<br>efflux               |   |
| ARO:3002680 | catB8               | chloramphenicol acetyltransferase (CAT)                             | phenicol antibiotic                                                                                                                | antibiotic<br>inactivation         |   |
| ARO:3002928 | vanR_in_v<br>anM_cl | glycopeptide resistance gene cluster;vanR                           | glycopeptide antibiotic                                                                                                            | antibiotic<br>target<br>alteration | 1 |
| ARO:3002683 | catA1               | chloramphenicol acetyltransferase (CAT)                             | phenicol antibiotic                                                                                                                | antibiotic                         |   |

|             |                     |                                                                             |                                                                                                                                                                                                                                                                    |                                          |   |
|-------------|---------------------|-----------------------------------------------------------------------------|--------------------------------------------------------------------------------------------------------------------------------------------------------------------------------------------------------------------------------------------------------------------|------------------------------------------|---|
|             |                     |                                                                             |                                                                                                                                                                                                                                                                    | inactivation                             |   |
| ARO:3004085 | InuG                | lincosamide nucleotidyltransferase (LNU)                                    | lincosamide antibiotic                                                                                                                                                                                                                                             | antibiotic<br>inactivation               | 1 |
| ARO:3000378 | MexB                | resistance-nodulation-cell division (RND)<br>antibiotic efflux pump         | aminocoumarin<br>antibiotic;carbapenem;cephalosporin;cephamycin;diaminopyrimidine<br>antibiotic;fluoroquinolone antibiotic;macrolide<br>antibiotic;monobactam;penam;penem;peptide antibiotic;phenicol<br>antibiotic;sulfonamide antibiotic;tetracycline antibiotic | antibiotic<br>efflux                     | 1 |
| ARO:3001777 | OXA-347             | OXA beta-lactamase                                                          | carbapenem;cephalosporin;penam                                                                                                                                                                                                                                     | antibiotic<br>inactivation               | 1 |
| ARO:3005044 | OmpA                | General Bacterial Porin with reduced<br>permeability to peptide antibiotics | peptide antibiotic                                                                                                                                                                                                                                                 | reduced<br>permeability<br>to antibiotic | 1 |
| ARO:3002972 | vanT_in_v<br>anG_cl | glycopeptide resistance gene cluster;vanT                                   | glycopeptide antibiotic                                                                                                                                                                                                                                            | antibiotic<br>target<br>alteration       | 0 |



**Supplementary Table 5. The database of fungal virulence factors (DFVF) of *B. uniformis* 1K1**

| Gene Function                              | FNMHLBE1K1 | Pathogen species               | Pathogen strain             | Host description | Tissue                                          |
|--------------------------------------------|------------|--------------------------------|-----------------------------|------------------|-------------------------------------------------|
| c-di-GMP phosphodiesterase                 | 1          | <i>Pseudomonas syringae</i>    | pv. tomato strain DC3000    | eudicots         | leaf                                            |
| polyphosphate kinase                       | 1          | <i>Proteus mirabilis</i>       | HI4320                      | rodents          | bladder                                         |
| phosphorelay protein                       | 4          | <i>Vibrio parahaemolyticus</i> | RIMD 2210633                | nematodes        |                                                 |
| effector (plant avirulence determinant)    | 3          | <i>Legionella pneumophila</i>  | 130b                        | rodents          | lung                                            |
| RNA polymerase sigma factor                | 1          | <i>Pseudomonas savastanoi</i>  | pv. glycinea strain Psg     | eudicots         | leaf                                            |
| cardiolipin                                | 4          | <i>Staphylococcus aureus</i>   | RN4220                      | rodents          |                                                 |
| dihydrofolate reductase                    | 1          | <i>Candida albicans</i>        | BWP17                       | rodents          | kidney                                          |
| ATP-dependent 6-phosphofructokinase        | 3          | <i>Erwinia amylovora</i>       | HKN06P1                     | eudicots         | fruit                                           |
| ketol-acid reductoisomerase, mitochondrial | 1          | <i>Metarhizium robertsii</i>   | ARSEF 2575                  | moths            | larva                                           |
| acetolactate synthases                     | 2          | <i>Magnaporthe oryzae</i>      | Guy11                       | monocots         | leaf                                            |
| dihydroxyacid dehydratase                  | 2          | <i>Aspergillus fumigatus</i>   | CEA10                       | rodents          | kidney                                          |
| chorismate synthase                        | 1          | <i>Aspergillus fumigatus</i>   | AfS35                       | rodents          | lung                                            |
| effector protein                           | 1          | <i>Francisella tularensis</i>  | subsp. novicida strain U112 | moths            |                                                 |
| lysine-tRNA synthetase                     | 1          | <i>Beauveria bassiana</i>      | ARSEF 2860                  | moths            | larva                                           |
| pyruvate dehydrogenase                     | 3          | <i>Streptococcus suis</i>      | ZY05719                     | rodents          | blood; brain;<br>liver; spleen;<br>kidney; lung |
| HAD-like hydrolase                         | 2          | <i>Cryptococcus neoformans</i> | H99                         | rodents          | lung; brain                                     |
|                                            |            |                                |                             |                  | lung; blood;                                    |

|                                                                                   |   |                                 |                                                        |           |                    |
|-----------------------------------------------------------------------------------|---|---------------------------------|--------------------------------------------------------|-----------|--------------------|
|                                                                                   |   |                                 |                                                        |           | nasopharynx        |
| virulence factor                                                                  | 2 | <i>Serratia marcescens</i>      | 2170                                                   | moths     |                    |
| conserved outer membrane lipoprotein                                              | 3 | <i>Riemerella anatipestifer</i> | RA-CH-1                                                | birds     | blood              |
| tyrosine phosphatase                                                              | 2 | <i>Porphyromonas gingivalis</i> | ATCC 33277                                             | rodents   | bone               |
| lactose negativity                                                                | 5 | <i>Salmonella enterica</i>      | subsp. enterica serovar Typhimurium strain ATCC 14028  | rodents   | liver; spleen      |
| exopolysaccharide synthesis enzyme [UDP-N-acetylglucosamine 2-epimerase]          | 4 | <i>Streptococcus mutans</i>     | UA159                                                  | rodents   | blood              |
| regulators of systemic infection                                                  |   | <i>Salmonella enterica</i>      | subsp. enterica serovar Typhimurium strain ATCC 14028s | rodents   | spleen; liver      |
| resistance to a wall teichoic acid (WTA)-binding bacteriophage                    | 1 | <i>Listeria monocytogenes</i>   | F6214-1                                                | rodents   | spleen; liver      |
| N-acetylmuramoyl-L-alanine amidase                                                | 1 | <i>Yersinia pestis</i>          | Kim53                                                  | rodents   |                    |
| DNA-binding transcriptional regulator                                             | 4 | <i>Pseudomonas aeruginosa</i>   | LESB58                                                 | rodents   | lung; nasal cavity |
| flavoalbumin                                                                      | 2 | <i>Magnaporthe oryzae</i>       | Guy11                                                  | monocots  | leaf               |
| AphB and OhrR monitor redox-potential changes and respond with different kinetics | 2 | <i>Vibrio cholerae</i>          |                                                        | rodents   | small intestine    |
| DNA-binding response regulator                                                    | 2 | <i>Acinetobacter baumannii</i>  | AB5075                                                 | moths     | larva              |
| β-galactosidase                                                                   | 2 | <i>Streptococcus suis</i>       | serotype 2 strain 05ZYH33                              | rodents   |                    |
| β-galactosidase                                                                   | 5 | <i>Escherichia coli</i>         | UTI89                                                  | rodents   | urinary bladder    |
| nudix hydrolase domain-containing protein                                         | 1 | <i>Pseudomonas aeruginosa</i>   | PAO1161                                                | nematodes | larva              |
| D-ribulose-phosphate 3-epimerase                                                  | 1 | <i>Francisella tularensis</i>   | subsp. novicida strain U112                            | flies     | adult              |

|                                                                                                                                                                              |   |                           |                          |                     |                                                     |
|------------------------------------------------------------------------------------------------------------------------------------------------------------------------------|---|---------------------------|--------------------------|---------------------|-----------------------------------------------------|
| formyl methionyl transferase                                                                                                                                                 | 1 | Staphylococcus aureus     | WCUH29                   | rodents             | kidney                                              |
| conserved hypothetical protein                                                                                                                                               | 7 | Xanthomonas oryzae        | pv. oryzae strain PXO99A | monocots            | leaf                                                |
| alanine/glycine transport protein                                                                                                                                            | 2 | Klebsiella pneumoniae     | ATCC 43816; MKP203       | rodents             | lung                                                |
| DNA repair                                                                                                                                                                   | 2 | Bacillus cereus           | ATCC 14579               | rodents             |                                                     |
| redox balance                                                                                                                                                                | 2 | Enterococcus faecalis     | V583                     | rodents             | liver; kidney                                       |
| branched-chain-amino-acid aminotransferase                                                                                                                                   | 1 | Bipolaris zeicola         | 164R10                   | monocots            |                                                     |
| alpha-1,2-mannosidase, putative                                                                                                                                              | 6 | Streptococcus suis        | ZY05719                  | rodents             | brain; blood;<br>spleen;<br>kidney                  |
| 2C-methyl-D-erythritol 2,4-cyclodiphosphate synthase                                                                                                                         | 1 | Xanthomonas citri         | subsp. citri             | eudicots            | leaf                                                |
| putative hydrolase                                                                                                                                                           | 1 | Bordetella bronchiseptica | RB50                     | rodents             | trachea                                             |
| redox-sensing transcriptional repressor                                                                                                                                      | 8 | Listeria monocytogenes    | 10403S                   | primates            | CACO-2 cell                                         |
| transcription factor                                                                                                                                                         | 1 | Fusarium graminearum      | GZ3639                   | monocots            |                                                     |
| DNA mismatch repair protein                                                                                                                                                  | 1 | Cryptococcus neoformans   | KN99 $\alpha$            | rodents             | lung; brain                                         |
| inosine-5'-monophosphate dehydrogenase                                                                                                                                       | 1 | Streptococcus suis        | ZY05719                  | even-toed ungulates |                                                     |
| part of proteolytic complex                                                                                                                                                  | 2 | Staphylococcus aureus     | NCTC 8325-4              | rodents             | skin                                                |
| cysteine ATP binding protein                                                                                                                                                 | 2 | Neisseria meningitidis    | NIID84 $\Delta$ cps      | primates            | brain<br>microvascula<br>r endothelial<br>cell line |
| putative phospho--glucosidase                                                                                                                                                | 2 | Streptococcus pyogenes    | 5448                     | rodents             | soft-tissue                                         |
| required for the synthesis of the Pseudomonas quinolone signal, a quorum sensing signal molecule that contributes to slow killing and the red death phenotype in C. elegans. | 1 | Pseudomonas aeruginosa    | PAO1                     | nematodes           | gastrointestin<br>al tract                          |

|                                                             |   |                          |                                                   |                           |                                               |
|-------------------------------------------------------------|---|--------------------------|---------------------------------------------------|---------------------------|-----------------------------------------------|
| phenylacetic acid catabolism                                | 1 | Burkholderia cenocepacia | K56-2                                             | nematodes                 | gastrointestinal tract                        |
| acetate kinase                                              | 2 | Vibrio cholerae          | SIO                                               | flies                     | gastrointestinal tract                        |
| phosphate acetyltransferase                                 | 1 | Streptococcus pneumoniae | TIGR4                                             | rodents                   |                                               |
| TldD protein, DNA gyrase control?                           | 1 | Xanthomonas campestris   | pv. campestris strain 8004                        | eudicots                  | leaf                                          |
| diadenylate cyclase                                         | 1 | Streptococcus pneumoniae | serotype 2 strain D39                             | lethal pathogen phenotype |                                               |
| dihydropteroate synthase                                    | 1 | Xanthomonas albilineans  | FS12                                              | monocots                  | leaf                                          |
| peptidyl-prolyl cis-trans isomerase                         | 2 | Pseudomonas aeruginosa   | PAO1                                              | rodents                   | lung                                          |
| involved in gallidermin and daptomycin resistance           | 3 | Staphylococcus aureus    | JE2                                               | moths                     | larva                                         |
| N-acetylmuramic acid-6-phosphate etherase                   | 1 | Staphylococcus aureus    | JE2                                               | bony fishes               | embryo                                        |
| L-fucose isomerase, C-terminal domain protein               |   | Klebsiella pneumoniae    | KPPR1                                             | rodents                   | lung; spleen                                  |
| transketolase I                                             | 1 | Francisella tularensis   | subsp. novicida strain U112                       | flies                     | adult                                         |
| arabinose 5-phosphate isomerase                             |   | Salmonella enterica      | subsp. enterica serovar Typhimurium strain 14028s | eudicots                  | leaf                                          |
| manganese homeostasis                                       | 1 | Streptococcus pyogenes   | 5448                                              | rodents                   |                                               |
| transcriptional regulator                                   | 3 | Staphylococcus aureus    | MW2                                               | primates                  | neutrophil                                    |
| ribosomal RNA small subunit methyltransferase H             | 1 | Staphylococcus aureus    | RN4220                                            | moths                     |                                               |
| UDP-N-acetylmuramoylalanine--D-glutamate ligase             | 2 | Pseudomonas aeruginosa   | PAO1                                              | rodents                   | lung                                          |
| 2,3-bisphosphoglycerate-independent phosphoglycerate mutase | 5 | Yersinia pestis          | CO92                                              | rodents                   | liver; spleen; bone marrow-derived macrophage |
|                                                             |   |                          | subsp. enterica serovar                           |                           |                                               |

|                                                        |   |                                |                           |             |                                                    |
|--------------------------------------------------------|---|--------------------------------|---------------------------|-------------|----------------------------------------------------|
|                                                        |   |                                | Typhimurium strain 14028s |             |                                                    |
| bifunctional riboflavin kinase/FMN adenylyltransferase | 2 | <i>Listeria monocytogenes</i>  | 10403S                    | rodents     | liver; spleen                                      |
| calcium transporting ATPase                            | 1 | <i>Beauveria bassiana</i>      | ARSEF 2860                | moths       | larva                                              |
| histidine kinase                                       | 5 | <i>Paracidovorax citrulli</i>  | Aac5                      | eudicots    | seedling                                           |
| anaerobic nitric oxide reductase flavorubredoxin       | 2 | <i>Aeromonas hydrophila</i>    | NJ-35                     | bony fishes |                                                    |
| Na <sup>+</sup> /phosphate symporter                   | 3 | <i>Staphylococcus aureus</i>   | Newman                    | rodents     | liver; heart;<br>kidney                            |
| alternative sigma factor                               | 4 | <i>Ralstonia solanacearum</i>  | GMI1000                   | eudicots    | leaf                                               |
| phosphoribosylaminoimidazole carboxylase               | 1 | <i>Candida albicans</i>        | CAI-7                     | rodents     |                                                    |
| lone S41 family C-terminal processing protease         | 4 | <i>Staphylococcus aureus</i>   | USA300 HOU                | rodents     | brain; heart;<br>lung; liver;<br>kidney;<br>spleen |
| an essential gene for the T3SS gene expression         | 1 | <i>Pseudomonas aeruginosa</i>  | PAK                       | rodents     | bronchoalveolar lavage fluid                       |
| nudix hydrolase domain-containing protein              | 1 | <i>Pseudomonas aeruginosa</i>  | PAO1161                   | nematodes   | larva                                              |
| histone-like protein                                   | 1 | <i>Xanthomonas citri</i>       | subsp. citri strain 306   | eudicots    | leaf                                               |
| endo-beta-1,4 xylanase                                 |   | <i>Magnaporthe oryzae</i>      | Br48                      | monocots    | leaf                                               |
| phosphoenolpyruvate carboxykinase                      | 1 | <i>Cryptococcus neoformans</i> | H99                       | rodents     |                                                    |
| putative GTPase                                        | 3 | <i>Yersinia pestis</i>         | CO92                      | rodents     | lung; spleen                                       |
| acyl-CoA ligase                                        | 1 | <i>Aspergillus fumigatus</i>   | ATCC 46645                | rodents     | lung                                               |
| quorum sensing                                         | 1 | <i>Enterococcus faecalis</i>   | Symbioflor 1              | rodents     | gut                                                |
| <i>Borrelia</i> glycosaminoglycan binding protein      | 4 | <i>Borrelia burgdorferi</i>    | B31 5A18                  | primates    | epithelial cell                                    |

|                                                                    |   |                             |                                                   |           |                                            |
|--------------------------------------------------------------------|---|-----------------------------|---------------------------------------------------|-----------|--------------------------------------------|
| pyruvate kinase I                                                  | 1 | Salmonella enterica         | subsp. enterica serovar Typhimurium strain 14028s | eudicots  | leaf                                       |
| outer membrane lipoprotein which acts as a sensor of YfiBNR system | 1 | Klebsiella pneumoniae       | LM21                                              | nematodes |                                            |
| sensor protein                                                     | 2 | Staphylococcus lugdunensis  | DSM 4804                                          | nematodes |                                            |
| 3-dehydroquinate synthase                                          | 3 | Burkholderia glumae         | 411gr-6                                           | monocots  | panicle                                    |
| HTH-type transcriptional regulator                                 | 1 | Klebsiella pneumoniae       | ATCC 43816; MKP203                                | rodents   | lung                                       |
| CT production                                                      | 2 | Vibrio cholerae             | O395                                              | rodents   | intestine                                  |
| possible role in chromosome segregation                            | 3 | Mycobacterium tuberculosis  | H37Rv                                             | rodents   |                                            |
| ATP-dependent zinc metalloprotease                                 | 1 | Corynebacterium diphtheriae | NCTC 13129                                        | nematodes |                                            |
| ribosomal RNA small subunit methyltransferase A                    | 2 | Pseudomonas amygdali        | pv. phaseolicola strain 1448A                     | eudicots  | pod; leaf                                  |
| multi-subunit Na <sup>+</sup> /H <sup>+</sup> (Mnh) antiporter     | 1 | Staphylococcus aureus       | Newman                                            | rodents   | kidney                                     |
| NADH-quinone oxidoreductase                                        | 6 | Pseudomonas aeruginosa      | PAO1                                              | moths     | larva                                      |
| ubiquinone oxidoreductase                                          | 2 | Fusarium graminearum        | PH-1                                              | monocots  |                                            |
| formate hydrogenlyase complex iron-sulfur subunit                  | 1 | Salmonella enterica         | subsp. enterica serovar Typhimurium strain 14028s | eudicots  | leaf                                       |
| Sec-independent protein translocase                                | 2 | Salmonella enterica         | subsp. enterica serovar Typhimurium strain SL1344 | rodents   | cecum;<br>mesenteric lymph node;<br>spleen |
| lipoic acid synthetase                                             | 2 | Staphylococcus aureus       | USA300 LAC                                        | rodents   | bone marrow-derived macrophage             |
| dipeptidyl peptidase IV                                            | 1 | Porphyromonas gingivalis    | ATCC 33277                                        | rodents   | skin                                       |
|                                                                    |   |                             | subsp. enterica serovar                           |           |                                            |

|                                                                  |   |                          |                            |          |                                |
|------------------------------------------------------------------|---|--------------------------|----------------------------|----------|--------------------------------|
|                                                                  |   |                          | Typhimurium strain 14028s  |          |                                |
| GlcN-6-phosphate deaminase                                       | 1 | Magnaporthe oryzae       | KJ201                      | monocots | leaf                           |
| gliding motility lipoprotein GldK                                | 2 | Riemerella anatipestifer | Yb2                        | birds    | blood                          |
| multifunctional fusion protein                                   | 1 | Acinetobacter baumannii  | ATCC 19606                 | primates | neutrophil                     |
| UDP-3-O-acyl-N-acetylglucosamine deacetylase                     | 2 | Acinetobacter baumannii  | ATCC 19606                 | primates | neutrophil                     |
| acyltransferases                                                 | 1 | Pseudomonas aeruginosa   | PAO1                       | beetles  | larva                          |
| peptide chain release factor 1                                   | 1 | Listeria monocytogenes   | EGD-e                      | primates | colorectal adenocarcinoma cell |
| shikimate dehydrogenase                                          | 2 | Staphylococcus aureus    | ATCC 29213                 | primates | HeLa cell                      |
| ubiquinone biosynthesis methyltransferase                        | 1 | Staphylococcus aureus    | ATCC 29213                 | primates | HeLa cell                      |
| LytM family regulator                                            |   | Xanthomonas campestris   | pv. campestris strain 8004 | eudicots | leaf                           |
| D-xylose-proton symporter                                        | 3 | Coxiella burnetii        | RSA 439                    | moths    | larva                          |
| 6,7-dimethyl-8-ribityllumazine synthase                          | 2 | Magnaporthe oryzae       | KV1                        | monocots | leaf                           |
| glyceraldehyde-3-phosphate dehydrogenase                         | 1 | Staphylococcus aureus    | USA300 JE2                 | moths    | larva                          |
| large-conductance mechanosensitive channel                       | 1 | Verticillium dahliae     | V991                       | eudicots | seedling                       |
| GMP synthase                                                     | 4 | Cryptococcus neoformans  | H99                        | rodents  | brain; lung                    |
| pantothenate-beta-alanine ligase                                 | 1 | Parastagonospora nodorum | SN15                       | monocots | seedling; leaf                 |
| aspartate alpha-decarboxylase                                    | 1 | Xanthomonas campestris   | pv. campestris strain 8004 | eudicots | leaf                           |
| peptidoglycan DD-endopeptidase/peptidoglycan LD-carboxypeptidase | 1 | Escherichia coli         | UTI89                      | rodents  | bladder; kidney                |
| formate acetyltransferase                                        | 1 | Streptococcus pneumoniae | TIGR4                      | rodents  |                                |
| tomatinase                                                       | 2 | Septoria lycopersici     | NEV                        | eudicots |                                |
| cysteine protease                                                | 1 | Staphylococcus aureus    | RN4220                     | birds    | embryo                         |
|                                                                  |   |                          | subsp. enterica serovar    |          |                                |

|                                                                                        |   |                                    |                                                    |                     |                                          |
|----------------------------------------------------------------------------------------|---|------------------------------------|----------------------------------------------------|---------------------|------------------------------------------|
|                                                                                        |   |                                    | Typhimurium strain ATCC 14028s                     |                     |                                          |
| hemin import ATP-binding protein                                                       | 2 | <i>Yersinia pseudotuberculosis</i> | IP2666                                             | even-toed ungulates | blood                                    |
| hemin import ATP-binding protein                                                       | 2 | <i>Yersinia pseudotuberculosis</i> | IP2666                                             | even-toed ungulates | blood                                    |
| peroxiredoxin peroxidase                                                               | 1 | <i>Magnaporthe oryzae</i>          | KJ201                                              | monocots            | leaf                                     |
| DNA strand exchange and recombination protein                                          | 2 | <i>Acinetobacter baumannii</i>     | ATCC 17978                                         | nematodes           | larva                                    |
| putative LysR family transcriptional regulator                                         | 2 | <i>Salmonella enterica</i>         | subsp. enterica serovar Typhimurium strain HA420   | rodents             | cecum; large intestine                   |
| chaperone protein                                                                      | 4 | <i>Pectobacterium carotovorum</i>  | subsp. carotovorum strain PccS1                    | eudicots            | petiole                                  |
| translocase                                                                            | 4 | <i>Streptococcus pneumoniae</i>    | serotype 2 strain D39                              | rodents             | nasopharynx; pleural cavity; lung; blood |
| bifunctional enzyme implicated in the imidazoleglycerol-phosphate dehydratase activity | 1 | <i>Xanthomonas oryzae</i>          | pv. oryzicola strain RS105                         | monocots            | leaf                                     |
| histidinol dehydrogenase                                                               | 1 | <i>Xanthomonas oryzae</i>          | pv. oryzae strain PXO99A                           | monocots            | leaf                                     |
| OAg biosynthesis                                                                       | 1 | <i>Salmonella enterica</i>         | subsp. enterica serovar Enteritidis strain P125109 | rodents             | spleen; liver; cecum                     |
| RNA-binding protein                                                                    | 2 | <i>Listeria monocytogenes</i>      | EGD-e                                              | moths               | larva                                    |
| MATE efflux family protein                                                             |   | <i>Streptococcus pneumoniae</i>    | serotype 2 strain D39                              | rodents             | blood; lung                              |
| lysine-dependent acid resistance (LDAR) system protein                                 |   | <i>Edwardsiella tarda</i>          | TX01                                               | primates            | HeLa cell                                |
| flagellar motility                                                                     | 1 | <i>Xanthomonas oryzae</i>          | pv. oryzae strain PXO99A                           | monocots            | leaf                                     |
| iron utilization                                                                       | 1 | <i>Acinetobacter baumannii</i>     | ATCC 19606                                         | moths               | larva                                    |
| sigma factor                                                                           | 1 | <i>Pseudomonas aeruginosa</i>      | PAO1                                               | rodents             | lung                                     |
| thioredoxin oxidoreductase, a target of MoAP1                                          |   |                                    |                                                    |                     |                                          |



|                                                               |   |                                   |                                                       |             |                            |
|---------------------------------------------------------------|---|-----------------------------------|-------------------------------------------------------|-------------|----------------------------|
| transcription factor governing oxidative response             |   |                                   |                                                       |             |                            |
| carbon monoxide resistance gene                               | 1 | <i>Mycobacterium tuberculosis</i> | H37Rv                                                 | rodents     | Lung; liver                |
| fusaric acid biosynthesis                                     | 2 | <i>Fusarium verticillioides</i>   | M-3125                                                | monocots    | leaf                       |
| resuscitation-promoting factor                                | 1 | <i>Vibrio harveyi</i>             | SF-1                                                  | bony fishes | peritoneum                 |
| UDP-N-acetylglucosamine 1-carboxyvinyltransferase             | 2 | <i>Pseudomonas aeruginosa</i>     | PAO1                                                  | rodents     | lung                       |
| UDP-glucose-4,6-dehydratase                                   | 4 | <i>Botrytis cinerea</i>           | B05.10                                                | eudicots    | leaf                       |
| glucose-1-phosphate thymidyltransferase                       | 2 | <i>Pseudomonas aeruginosa</i>     | PAO1                                                  | rodents     | lung                       |
|                                                               | 4 | <i>Xylella fastidiosa</i>         | Temecula                                              | eudicots    | stem; petiole              |
| UDP-N-acetylglucosamine transaminase                          | 6 | <i>Campylobacter jejuni</i>       | NCTC 11168                                            | primates    | intestinal epithelial cell |
| lipopolysaccharide biosynthesis and pathogenicity             | 1 | <i>Riemerella anatipestifer</i>   | Yb2                                                   | birds       |                            |
| asparagine synthase B                                         | 1 | <i>Erwinia amylovora</i>          | HKN06P1                                               | eudicots    | fruit                      |
| glucosamine-fructose-6-phosphateaminotransferase              | 1 | <i>Erwinia amylovora</i>          | HKN06P1                                               | eudicots    | fruit                      |
| carbamoyl-phosphate synthase subunit arginine-specific small  | 2 | <i>Magnaporthe oryzae</i>         | Guy11                                                 | monocots    | leaf                       |
| encodes a putative TCS response regulator                     | 3 | <i>Xanthomonas campestris</i>     | pv. campestris strain 8004                            | eudicots    | leaf                       |
| ABC-type efflux pump                                          | 6 | <i>Salmonella enterica</i>        | subsp. enterica serovar Typhimurium strain ATCC 14028 | rodents     | spleen; liver              |
| beta-glucoside permease                                       | 3 | <i>Streptococcus pyogenes</i>     | 5448                                                  | rodents     | soft-tissue                |
| (P)ppGpp synthetase                                           | 2 | <i>Staphylococcus aureus</i>      | USA300                                                | primates    | endothelial cell           |
| formate-dependent phosphoribosylglycinamide formyltransferase | 6 | <i>Escherichia coli</i>           | UTI89                                                 | primates    | J-82 cell                  |

|                                                                                                                   |   |                                   |                                                      |          |                        |
|-------------------------------------------------------------------------------------------------------------------|---|-----------------------------------|------------------------------------------------------|----------|------------------------|
| DNA gyrase (bacterial topoisomerase II)                                                                           |   | <i>Burkholderia glumae</i>        | Pg-7                                                 | monocots | seedling               |
| heat shock protein 90 chaperone                                                                                   | 2 | <i>Escherichia coli</i>           | SP15                                                 | rodents  |                        |
| TetR type regulator                                                                                               | 1 | <i>Acinetobacter baumannii</i>    | ATCC 17978                                           | moths    | larva                  |
| multidrug efflux RND transporter                                                                                  | 4 | <i>Pseudomonas syringae</i>       | pv. tabaci strain 6605                               | eudicots | leaf                   |
| efflux pump membrane transporter                                                                                  | 1 | <i>Pseudomonas aeruginosa</i>     | PAO1                                                 | rodents  | lung                   |
| capsule                                                                                                           | 1 | <i>Burkholderia pseudomallei</i>  | DD503                                                | rodents  | lung; liver;<br>spleen |
| quorum-sensing regulator                                                                                          | 1 | <i>Vibrio cholerae</i>            | El Tor                                               | rodents  |                        |
| TCS sensor kinase                                                                                                 | 1 | <i>Xanthomonas campestris</i>     | pv. campestris strain 8004                           | eudicots | leaf                   |
| ATP-dependent protease                                                                                            | 2 | <i>Salmonella enterica</i>        | subsp. enterica serovar<br>Typhimurium strain 14028s | rodents  | ileum                  |
| phosphoserine phosphatase SerB:haloacid<br>dehalogenase-like hydrolase:HAD-superfamily<br>hydrolase, subfamily IB | 3 | <i>Brucella melitensis</i>        | 2308                                                 | rodents  | spleen                 |
| RNA helicase                                                                                                      | 4 | <i>Listeria monocytogenes</i>     | EGD-e                                                | rodents  | macrophage             |
| UDP-glucose dehydrogenase                                                                                         | 1 | <i>Cryptococcus neoformans</i>    | serotype D strain JEC21                              | rodents  |                        |
| trehalose-6-phosphate synthase                                                                                    | 1 | <i>Magnaporthe oryzae</i>         | Guy11                                                | monocots |                        |
| possible dehydrogenase                                                                                            | 1 | <i>Mycobacterium tuberculosis</i> | H37Rv                                                | rodents  |                        |
| RNA polymerase-binding protein                                                                                    | 2 | <i>Pseudomonas aeruginosa</i>     | PAO1                                                 | rodents  |                        |
| malonyl CoA-acyl carrier protein transacylase                                                                     | 2 | <i>Staphylococcus aureus</i>      | F-182                                                | moths    | larva                  |
| thiamine-phosphate synthase                                                                                       | 2 | <i>Pseudomonas syringae</i>       | pv. tomato strain DC3000                             | eudicots | leaf                   |
| thiazole synthase                                                                                                 | 2 | <i>Pseudomonas syringae</i>       | pv. tomato strain DC3000                             | eudicots | leaf                   |
| SUMOylation-associated protein                                                                                    | 2 | <i>Magnaporthe oryzae</i>         | KJ201                                                | monocots | leaf                   |
| phosphomethylpyrimidine kinase                                                                                    | 1 | <i>Verticillium dahliae</i>       | 991                                                  | eudicots | root; leaf             |
| glycogen branching enzyme                                                                                         | 2 | <i>Fusarium oxysporum</i>         | f. sp. lycopersici strain 4287                       | eudicots | leaf                   |

|                                                            |   |                            |                                                        |                           |                      |
|------------------------------------------------------------|---|----------------------------|--------------------------------------------------------|---------------------------|----------------------|
| 8-amino-7-oxononanoate synthase                            | 2 | Riemerella anatipestifer   | Yb2                                                    | birds                     |                      |
| NADH pyrophosphatase                                       | 1 | Xanthomonas campestris     | pv. campestris strain 8004                             | eudicots                  | leaf                 |
| phosphoglucomutase                                         | 1 | Streptococcus parauberis   | KSP20                                                  | bony fishes               | kidney               |
| nitronate monooxygenases                                   | 1 | Aspergillus fumigatus      | CEA10                                                  | moths                     | larva                |
| putative aminotransferase                                  | 1 | Klebsiella pneumoniae      | 52.145                                                 | moths                     | larva                |
| transcription factor                                       | 2 | Fusarium graminearum       | GZ3639                                                 | monocots                  |                      |
| RNA polymerase sigma factor                                | 2 | Pseudomonas aeruginosa     | PA14                                                   | rodents                   | lung                 |
| protease                                                   | 1 | Glaesserella parasuis      | SC1401                                                 | rodents                   | lung                 |
| phosphate-specific transport system accessory protein PhoU | 3 | Salmonella enterica        | subsp. enterica serovar Typhimurium strain ATCC 14028s | rodents                   | macrophage           |
| phosphate import ATP-binding protein                       | 3 | Staphylococcus aureus      | Newman                                                 | rodents                   | liver; heart; kidney |
| PstA component of phosphate uptake                         | 1 | Mycobacterium tuberculosis | H37Rv                                                  | rodents                   |                      |
| phosphate-binding protein/ thioredoxine reductase          | 3 | Staphylococcus aureus      | Newman                                                 | rodents                   | liver; heart; kidney |
| glutamate-tRNA synthetase                                  | 1 | Aspergillus fumigatus      | CEA10                                                  | lethal pathogen phenotype |                      |
| putative zinc-binding dehydrogenase                        | 1 | Pseudomonas aeruginosa     | UCBPP-PA14                                             | nematodes                 |                      |
| conserved hypothetical protein                             | 1 | Xanthomonas campestris     | pv. campestris strain Xc17                             | eudicots                  | leaf                 |
| pyridoxal phosphate-dependent enzyme                       | 1 | Paracidovorax citrulli     | XjL12                                                  | eudicots                  | seedling; seed       |
|                                                            | 1 | Francisella tularensis     | SCHU S4                                                | rodents                   |                      |
| effector protein                                           | 6 | Ralstonia solanacearum     | OE1-1                                                  | eudicots                  | leaf                 |
| ALA synthase                                               | 1 | Parastagonospora nodorum   | SN15                                                   | monocots                  |                      |

|                                                                                                   |   |                                   |                                                               |                     |                                       |
|---------------------------------------------------------------------------------------------------|---|-----------------------------------|---------------------------------------------------------------|---------------------|---------------------------------------|
| diamiopimelate decarboxylase                                                                      | 1 | <i>Dickeya dadantii</i>           | 3937                                                          | eudicots            | leaf                                  |
| fusaric acid biosynthesis                                                                         | 1 | <i>Fusarium verticillioides</i>   | M-3125                                                        | monocots            | leaf                                  |
| imidazole glycerol phosphate synthase cyclase subunit                                             | 2 | <i>Acinetobacter baumannii</i>    | ATCC 17978                                                    | rodents             | lung                                  |
| N-(5'-phospho-L-ribosyl-formimino)-5-amino-1-(5'-phosphoribosyl)-4-imidazolecarboxamide isomerase | 3 | <i>Erwinia amylovora</i>          | HKN06P1                                                       | eudicots            | fruit                                 |
| phosphoribosylglycinamide formyltransferase                                                       | 2 | <i>Staphylococcus aureus</i>      | Newman                                                        | rodents             |                                       |
| encodes a 16-kDa-crystallin-like protein that is a major antigen                                  |   | <i>Mycobacterium tuberculosis</i> | H37Rv                                                         | rodents             | lung; spleen                          |
| 2-isopropylmalate synthase                                                                        | 1 | <i>Dickeya dadantii</i>           | 3937                                                          | eudicots            | leaf                                  |
| 3-isopropylmalate dehydratase large subunit                                                       | 2 | <i>Klebsiella pneumoniae</i>      | KPPR1                                                         | rodents             | lung;<br>bronchoalveolar lavage fluid |
| 3-isopropylmalate dehydrogenase                                                                   | 1 | <i>Xanthomonas oryzae</i>         | pv. <i>oryzae</i> strain PXO99A                               | monocots            | leaf                                  |
| cystathionine-beta-synthase                                                                       | 2 | <i>Aspergillus fumigatus</i>      | ATCC 46645                                                    | rodents             | lung                                  |
| virulence related two-component system                                                            | 1 | <i>Streptococcus suis</i>         | serotype 2 strain 05ZYH33                                     | even-toed ungulates | brain; lung                           |
| ferric uptake regulation protein                                                                  | 1 | <i>Riemerella anatipestifer</i>   | RA-CH-1                                                       | birds               | spleen; heart;<br>liver; brain        |
| pathogenicity island                                                                              | 2 | <i>Salmonella enterica</i>        | subsp. <i>enterica</i> serovar Typhimurium strain NCTC S12023 | rodents             | spleen; liver                         |
| folding of newly synthesized proteins, preventing misfolding and aggregation                      | 1 | <i>Porphyromonas gingivalis</i>   | ATCC 33277                                                    | rodents             | gingiva                               |
|                                                                                                   |   |                                   | subsp. <i>enterica</i> serovar Typhimurium strain ATCC        |                     | ileum; liver;                         |

|                                                 |   |                          |                                                       |                           |                      |
|-------------------------------------------------|---|--------------------------|-------------------------------------------------------|---------------------------|----------------------|
|                                                 |   |                          | 14028                                                 |                           |                      |
| putative electron transfer protein beta subunit | 1 | Salmonella enterica      | subsp. enterica serovar Typhimurium strain ATCC 14028 | rodents                   | ileum; liver; spleen |
| phosphoribosylformyl-glycineamide synthetase    | 1 | Dickeya dadantii         | 3937                                                  | eudicots                  | leaf                 |
| dTDP-4-dehydrorhamnose reductas                 | 2 | Streptococcus pyogenes   | 5448                                                  | lethal pathogen phenotype |                      |
| carboxyl transferase                            | 6 | Enterococcus faecalis    | JH2-2                                                 | moths                     | larva                |
| Na <sup>+</sup> membrane pump                   | 6 | Enterococcus faecalis    | JH2-2                                                 | moths                     | larva                |
| multidrug efflux transporter                    | 3 | Vibrio cholerae          | JB58 (Smr ΔlacZ)                                      | rodents                   | intestine            |
| beta-galactosidase                              | 3 | Streptococcus pneumoniae | serotype 4 strain TIGR4                               | rodents                   |                      |
| phosphoglycerate kinase 2                       | 2 | Toxoplasma gondii        | RH                                                    | rodents                   |                      |
| transaldolase                                   | 1 | Francisella tularensis   | subsp. novicida strain U112                           | flies                     | adult                |
| transcriptional regulators                      | 4 | Pseudomonas syringae     | pv. actinidiae strain G1                              | eudicots                  | leaf                 |
| RNase Y                                         | 1 | Enterococcus faecalis    | V19                                                   | moths                     | larva                |
| virulence protein                               | 1 | Salmonella enterica      | subsp. enterica serovar Typhimurium strain 14028s     | rodents                   |                      |
| effector                                        | 2 | Pseudomonas syringae     | pv. tomato strain DC3000                              | eudicots                  | leaf                 |
| iron ABC transporter substrate-binding protein  | 1 | Salmonella enterica      | subsp. enterica serovar Typhimurium strain 14028s     | eudicots                  | leaf                 |
| transcription factor                            | 1 | Fusarium graminearum     | GZ3639                                                | monocots                  |                      |
| encode alpha-(1-6)-mannosyl-transferases        | 1 | Candida glabrata         | CBS 138                                               | rodents                   |                      |
| ATP-dependent Clp protease ATP-binding subunit  | 1 | Dickeya dadantii         | 3937                                                  | eudicots                  | leaf                 |
| ATP-dependent Clp protease adapter protein      | 1 | Dickeya dadantii         | 3937                                                  | eudicots                  | leaf                 |
| 3-ketoacyl-acyl carrier protein reductase       | 2 | Ralstonia solanacearum   | GMI1000                                               | eudicots                  |                      |

|                                                                                             |   |                            |                                                   |                     |                                                                             |
|---------------------------------------------------------------------------------------------|---|----------------------------|---------------------------------------------------|---------------------|-----------------------------------------------------------------------------|
| acetylglutamate kinase                                                                      | 1 | Staphylococcus aureus      | USA300 JE2                                        | rodents             | kidney                                                                      |
| sulfur mobilization                                                                         | 2 | Salmonella enterica        | subsp. enterica serovar Typhimurium strain 12023  | rodents             | spleen                                                                      |
| cysteine desulfurase                                                                        | 1 | Salmonella enterica        | subsp. enterica serovar Typhimurium strain 14028s | eudicots            | leaf                                                                        |
| polynucleotide phosphorylase, an exoribonuclease involved in RNA processing and degradation | 1 | Salmonella enterica        | subsp. enterica serovar Typhimurium strain X4232  | even-toed ungulates | tonsil; lymph node; Peyer's gland; cecum                                    |
| transcription elongation factor                                                             | 1 | Salmonella enterica        | subsp. enterica serovar Typhimurium strain SV5015 | rodents             | liver; spleen                                                               |
| cyclophilin-type peptidyl-prolyl-cis/trans-isomerase                                        | 1 | Clostridioides difficile   | 630Δerm                                           | rodents             | fibroblast cell line                                                        |
| protein tyrosine phosphatases                                                               | 1 | Burkholderia cenocepacia   | K56-2                                             | moths               | larva                                                                       |
| involved in bile salt stress and endocarditis pathogenesis                                  |   | Enterococcus faecium       | DO                                                | rodents             | heart                                                                       |
| aminopeptidase P family protein                                                             | 1 | Campylobacter jejuni       | 81-176                                            | rodents             | stomach; duodenum; ileum; colon; liver; lung; kidney; mesenteric lymph node |
| elongation factor Tu                                                                        | 2 | Staphylococcus aureus      | ATCC 29213                                        | primates            | HeLa cell                                                                   |
| 50S ribosomal protein                                                                       | 1 | Mycobacterium tuberculosis | CDC1551                                           | primates            | monocyte                                                                    |
| beta-subunit of the RNA polymerase                                                          | 1 | Acinetobacter baumannii    | ATCC 17978                                        | nematodes           |                                                                             |
| transcription factor                                                                        | 2 | Fusarium graminearum       | GZ3639                                            | monocots            |                                                                             |

|                                                |   |                                   |                                 |                     |                                                           |
|------------------------------------------------|---|-----------------------------------|---------------------------------|---------------------|-----------------------------------------------------------|
| 50S ribosomal protein                          | 2 | <i>Bordetella pertussis</i>       | Tohama I                        | primates            | macrophage                                                |
| protein translocase subunit SecY               | 2 | <i>Listeria monocytogenes</i>     | 10403S                          | rodents             | spleen; liver                                             |
| effector protein                               | 2 | <i>Citrobacter rodentium</i>      | DBS100                          | rodents             | colon; liver;<br>spleen                                   |
| multidrug efflux protein                       | 3 | <i>Acinetobacter baumannii</i>    | BM4587                          | rodents             | blood; lung;<br>liver; spleen                             |
| RND-type efflux pump membrane transporter      | 4 | <i>Campylobacter jejuni</i>       | 81-176                          | eukaryotes          |                                                           |
| cytokinin production                           | 2 | <i>Claviceps purpurea</i>         | 20.1                            | monocots            | floret                                                    |
| 2-dehydro-3-deoxy-D-gluconate 5-dehydrogenase  | 1 | <i>Pectobacterium carotovorum</i> | subsp. carotovorum strain PccS1 | monocots            | petiole                                                   |
| peptidoglycan deacetylase                      | 1 | <i>Listeria monocytogenes</i>     | 10403S                          | rodents             | liver; spleen                                             |
| phosphoribosylamine-glycine ligase             | 1 | <i>Xanthomonas campestris</i>     | pv. campestris strain 8004      | eudicots            | leaf                                                      |
| cystathionine beta-synthase                    | 1 | <i>Candida albicans</i>           | CAF2-1                          | rodents             | Kidney                                                    |
| cell wall biogenesis protein phosphatase       | 2 | <i>Aspergillus fumigatus</i>      | CEA17                           | rodents             | lung                                                      |
| manganese export protein                       | 1 | <i>Streptococcus suis</i>         | serotype 2 strain SC19          | rodents             | blood; brain;<br>heart; liver;<br>spleen; lung;<br>kidney |
| DNA processing protein                         | 2 | <i>Streptococcus pneumoniae</i>   | serotype 2 strain D39           | rodents             | nasopharynx;<br>lung; spleen                              |
| fumarate reductase                             | 1 | <i>Edwardsiella ictaluri</i>      | 93-146                          | bony fishes         |                                                           |
| DNA repair                                     | 1 | <i>Streptococcus pneumoniae</i>   | serotype 2 strain D39           | rodents             | blood; lung                                               |
| putative DNA binding protein                   | 1 | <i>Yersinia pestis</i>            | CO92                            | rodents             | lymph node;<br>spleen                                     |
| Fe(3+) dicitrate transport ATP-binding protein | 1 | <i>Escherichia coli</i>           | serotype O32:H37 strain P4      | even-toed ungulates | mammary<br>gland                                          |
|                                                |   |                                   |                                 |                     | bladder;                                                  |

|                                            |    |                          |                             |                              |                                    |
|--------------------------------------------|----|--------------------------|-----------------------------|------------------------------|------------------------------------|
|                                            |    |                          |                             |                              | kidney;<br>spleen                  |
| dihydrodipicolinate synthase               |    | Edwardsiella piscicida   | FPC498                      | bony fishes                  | larva                              |
| sialidase                                  |    | Clostridium perfringens  | F4969                       | primates                     | HEp-2 cell                         |
| N-acetylneuraminate synthase               | 1  | Vibrio vulnificus        | CMCP6                       | crustaceans                  | napulii                            |
| polysaccharide biosynthesis protein        | 3  | Enterococcus faecium     | U0317                       | rodents                      | Liver; kidney                      |
| CTP synthase                               | 1  | Xanthomonas albilineans  | FS12                        | monocots                     | leaf                               |
| Na(+)-translocating NADH-quinone reductase | 36 | Pseudomonas aeruginosa   | PAO1                        | moths                        | larva                              |
| UDP-glucose 4-epimerase                    | 2  | Haemophilus influenzae   | NTHi 375                    | rodents                      | lung                               |
| F1Fo-ATP synthase $\alpha$ subunit         | 1  | Candida albicans         | SC5314                      | moths                        | larva                              |
| F1F0 ATPase                                | 1  | Staphylococcus aureus    | USA300 LAC                  | rodents                      | skin                               |
| transcriptional regulatory protein         | 1  | Staphylococcus aureus    | ATCC 29213                  | rodents                      | tibia                              |
| sensor histidine kinase                    |    | Staphylococcus aureus    | MN8                         | rabbits and hares            | aortic valve                       |
| serine hydroxymethyltransferase            | 1  | Edwardsiella ictaluri    | 93-146                      | bony fishes                  |                                    |
| ribose phosphate pyrophosphokinase         | 1  | Francisella tularensis   | SCHU S4                     | rodents                      |                                    |
| ribose 5-phosphate isomerase A             | 1  | Francisella tularensis   | subsp. novicida strain U112 | flies                        | adult                              |
| phenylacetate-coenzyme A ligase            | 4  | Burkholderia cenocepacia | K56-2                       | nematodes                    |                                    |
| heat shock protein                         | 1  | Pseudomonas aeruginosa   | PAO1                        | flies                        |                                    |
| GDP-D-mannose dehydratase                  | 3  | Helicobacter pylori      | 26695                       | primates                     | gastric<br>epithelium<br>cell line |
| genes involved in side-chain formation     |    | Streptococcus suis       | serotype 2 strain 89/1591   | lethal pathogen<br>phenotype |                                    |
| membrane transporter                       | 1  | Burkholderia glumae      | BGR1                        | monocots                     | panicle                            |
|                                            |    |                          |                             |                              | liver; heart;                      |



|                                                                     |   |                                 |                                   |             |                           |
|---------------------------------------------------------------------|---|---------------------------------|-----------------------------------|-------------|---------------------------|
|                                                                     |   |                                 |                                   |             | kidney                    |
| 6-phosphogluconate dehydrogenase                                    | 1 | <i>Botrytis cinerea</i>         | B05.10                            | eudicots    | fruit                     |
| phenazine biosynthesis genes                                        | 2 | <i>Pseudomonas aeruginosa</i>   | UCBPP-PA14                        | nematodes   |                           |
| putative sensor histidine kinase                                    |   | <i>Ralstonia solanacearum</i>   | OE1-1                             | eudicots    | root                      |
| Tol-Pal system protein                                              | 2 | <i>Acinetobacter baumannii</i>  | ATCC 19606                        | moths       | larva                     |
| ABC transporter ATP-binding protein-spermidine/putrescine transport | 4 | <i>Streptococcus pneumoniae</i> | serotype 4 strain TIGR4           | rodents     | lung                      |
| serine 3-dehydrogenase                                              | 1 | <i>Klebsiella pneumoniae</i>    | KPPR1                             | rodents     | lung; spleen              |
| DExD-box RNA-helicase                                               | 2 | <i>Listeria monocytogenes</i>   | EGD-e                             | primates    | CACO-2 cell               |
| virulence factor                                                    | 1 | <i>Cronobacter universalis</i>  | LMG 26249                         | primates    | THP-1 cell                |
| ABC transporter, ATP-binding protein                                | 4 | <i>Porphyromonas gingivalis</i> | W83                               | rodents     |                           |
| glycine dehydrogenase                                               | 1 | <i>Edwardsiella ictaluri</i>    | 93-146                            | bony fishes |                           |
| metallo-beta-lactamase superfamily protein                          | 4 | <i>Listeria monocytogenes</i>   | 10403S                            | rodents     | spleen; liver             |
| copper-translocating P-type ATPase                                  | 4 | <i>Acinetobacter baumannii</i>  | AB5075_UW                         | rodents     | nasopharynx<br>epithelium |
| RND family efflux transporter                                       | 1 | <i>Klebsiella pneumoniae</i>    | NCTC 9633                         | nematodes   | larva                     |
| potassium homeostasis and virulence                                 | 1 | <i>Pseudomonas syringae</i>     | MB03                              | nematodes   | gut                       |
| transport of small molecules                                        | 3 | <i>Pseudomonas aeruginosa</i>   | PAO1-L                            | nematodes   |                           |
| response regulator                                                  | 3 | <i>Xanthomonas oryzae</i>       | pv. <i>oryzae</i> strain PXO99A   | monocots    | leaf                      |
| oxidoreductase                                                      | 1 | <i>Xanthomonas campestris</i>   | pv. <i>campestris</i> strain 8004 | eudicots    | leaf                      |
| purine salvage pathway                                              | 2 | <i>Staphylococcus aureus</i>    | Newman                            | primates    | macrophage                |
| ABC transporter, permease protein, putative                         | 4 | <i>Porphyromonas gingivalis</i> | W83                               | rodents     |                           |
| acetaldehyde-CoA/alcohol dehydrogenase                              |   | <i>Streptococcus suis</i>       | ZY05719                           | bony fishes | larva                     |
| arginine repressor                                                  | 1 | <i>Citrobacter rodentium</i>    | DBS770                            | rodents     | cecum; colon              |
| argininosuccinate synthase                                          | 1 | <i>Erwinia amylovora</i>        | HKN06P1                           | eudicots    | fruit                     |

|                                                                              |   |                          |                                                   |             |                            |
|------------------------------------------------------------------------------|---|--------------------------|---------------------------------------------------|-------------|----------------------------|
| argD gene encodes a predicted N-acetylornithine aminotransferase enzyme      | 2 | Erwinia amylovora        | HKN06P1                                           | eudicots    | shoot; fruit               |
| argininosuccinate lyase                                                      | 1 | Xanthomonas oryzae       | pv. oryzae strain PXO99A                          | monocots    | leaf                       |
| N-5-glutamine S-adenosyl-L-methionine-dependent methyltransferase            | 2 | Xanthomonas campestris   | pv. campestris strain 8004                        | eudicots    | leaf                       |
| gingipain production                                                         | 1 | Porphyromonas gingivalis | W83                                               | rodents     |                            |
| glutamate racemase                                                           | 1 | Streptococcus iniae      | HNM-1                                             | bony fishes | blood                      |
| gamma-glutamyl phosphate reductase                                           | 3 | Legionella pneumophila   | Corby                                             | primates    | lung                       |
| elongation factor                                                            | 1 | Salmonella enterica      | subsp. enterica serovar Typhimurium strain 14028s | rodents     | macrophage                 |
| adenylylsulfate kinase protein required for Ax21 (synonym: AvrXa21) activity | 1 | Xanthomonas oryzae       | pv. oryzae strain PXO99A                          | monocots    |                            |
| sulfate adenylyltransferase (ATP) required for Ax21 activity                 | 1 | Xanthomonas oryzae       | pv. oryzae strain PXO99A                          | monocots    |                            |
| adenylyl-sulfate kinase                                                      | 2 | Magnaporthe oryzae       | 70-15                                             | monocots    | leaf                       |
| DEAD-box RNA helicase                                                        | 2 | Pseudomonas aeruginosa   | PAO1                                              | moths       | larva                      |
| galactokinase                                                                | 1 | Escherichia coli         | UTI89                                             | rodents     | urinary bladder            |
| glucose transporter gene                                                     | 1 | Xanthomonas campestris   | pv. campestris strain 8008                        | eudicots    |                            |
| hydrogen peroxide sensor                                                     | 1 | Staphylococcus aureus    | Newman                                            | nematodes   |                            |
| pyrophosphate--fructose 6-phosphate 1-phosphotransferase                     | 1 | Toxoplasma gondii        | RH                                                | rodents     |                            |
| multidrug resistance protein                                                 | 1 | Pseudomonas aeruginosa   | PAO1                                              | rodents     | lung                       |
| acyltransferases                                                             | 1 | Pseudomonas aeruginosa   | PAO1                                              | beetles     | larva                      |
| thioredoxin A                                                                | 2 | Acinetobacter baumannii  | CI79                                              | rodents     | lung; liver; spleen; blood |

|                                         |   |                            |                                                       |                     |                                              |
|-----------------------------------------|---|----------------------------|-------------------------------------------------------|---------------------|----------------------------------------------|
| redox activity                          | 2 | Salmonella enterica        | subsp. enterica serovar Typhimurium strain ATCC 14028 | nematodes           |                                              |
| transcriptional regulator               | 1 | Staphylococcus aureus      | ATCC 29213                                            | primates            | HeLa cell                                    |
| tryptophanase                           | 2 | Escherichia coli           | EDL933                                                | nematodes           | intestine                                    |
| single-stranded DNA-binding protein     | 2 | Xanthomonas oryzae         | pv. oryzae strain RS105                               | monocots            | leaf                                         |
| endoribonucleases                       | 1 | Salmonella enterica        | subsp. enterica serovar Typhimurium strain SL1344     | moths               | larva                                        |
| oxaloacetate decarboxylase beta subunit | 1 | Vibrio cholerae            | PSU 966                                               | moths               | larva                                        |
| fructose-bisphosphate aldolase          | 1 | Staphylococcus aureus      | USA300 JE2                                            | moths               | larva                                        |
| enolase                                 | 4 | Streptococcus suis         | CVCC606                                               | even-toed ungulates | brain<br>microvascular endothelial cell line |
| transcription factor                    | 3 | Streptococcus suis         | SS2                                                   | rodents             | lung; spleen;<br>liver; brain;<br>blood      |
| NADH oxidase                            | 1 | Streptococcus suis         | SS2                                                   | rodents             | lung; spleen;<br>liver; brain;<br>blood      |
| regulatory protein                      | 1 | Escherichia coli           | PCN033                                                | rodents             | brain; spleen;<br>Lung                       |
| peptidase M13                           | 1 | Mycobacterium tuberculosis | H37Rv                                                 | rodents             | lung                                         |
| transglycosylase                        | 4 | Mycobacterium tuberculosis | H37Rv                                                 | rodents             | lung; spleen                                 |
| homoserine O-succinyltransferase        | 1 | Erwinia amylovora          | HKN06P1                                               | eudicots            | fruit                                        |
|                                         |   |                            |                                                       |                     | gastric                                      |

|                                                           |   |                                  |                                                          |                     |                                        |
|-----------------------------------------------------------|---|----------------------------------|----------------------------------------------------------|---------------------|----------------------------------------|
|                                                           |   |                                  |                                                          |                     | epithelial cell                        |
| threonine synthase                                        | 1 | <i>Xanthomonas oryzae</i>        | pv. <i>oryzae</i> strain PXO99A                          | monocots            | leaf                                   |
| ribosomal RNA small subunit methyltransferase I           | 1 | <i>Staphylococcus aureus</i>     | RN4220                                                   | moths               |                                        |
| putative RpiR-family transcriptional regulator            | 2 | <i>Salmonella enterica</i>       | subsp. <i>enterica</i> serovar Typhimurium strain 14028s | rodents             | liver; spleen                          |
| D-glycero-D-manno-heptose-1,7-bisphosphate phosphatase    | 1 | <i>Helicobacter pylori</i>       | 26695                                                    | primates            | gastric epithelium cell line           |
| part of cluster involved in lipooligosaccharide synthesis | 1 | <i>Glaesserella parasuis</i>     | SC096                                                    | even-toed ungulates | umbilical vein endothelial cell        |
| acyl carrier protein                                      | 2 | <i>Pseudomonas aeruginosa</i>    | PAO1                                                     | rodents             | lung                                   |
| polyketide synthase                                       | 1 | <i>Fusarium graminearum</i>      | PH-1                                                     | monocots            |                                        |
| RNase III                                                 | 1 | <i>Enterococcus faecalis</i>     | V19                                                      | moths               | larva                                  |
| phenylacetic acid degradation protein                     | 3 | <i>Burkholderia cenocepacia</i>  | K56-2                                                    | nematodes           |                                        |
| acyltransferases                                          | 1 | <i>Pseudomonas aeruginosa</i>    | PAO1                                                     | beetles             | larva                                  |
| methionine sulfoxide reductase catalytic subunit          | 1 | <i>Brucella melitensis</i>       | M28                                                      | rodents             | spleen; bone marrow-derived macrophage |
| D-arabinose 5-phosphate isomerase                         | 1 | <i>Francisella tularensis</i>    | SCHU S4                                                  | rodents             | lung; spleen                           |
| DNA protection during starvation protein                  | 2 | <i>Agrobacterium tumefaciens</i> | C58                                                      | eudicots            | leaf                                   |
| oxidative stress regulatory protein                       | 1 | <i>Pseudomonas savastanoi</i>    | pv. <i>phaseolicola</i> strain NPS3121                   | eudicots            | pod                                    |
|                                                           |   |                                  | subsp. <i>enterica</i> serovar Typhimurium strain ATCC   |                     |                                        |

|                                                             |   |                                       |                                                   |                           |                              |
|-------------------------------------------------------------|---|---------------------------------------|---------------------------------------------------|---------------------------|------------------------------|
|                                                             |   |                                       | 14028                                             |                           |                              |
| thioredoxin reductase                                       | 1 | <i>Cryptococcus neoformans</i>        | H99                                               | lethal pathogen phenotype |                              |
|                                                             | 4 | <i>Salmonella enterica</i>            | subsp. enterica serovar Typhimurium strain SL1344 | rodents                   |                              |
| tRNA uridine 5-carboxymethylaminomethyl modification enzyme | 1 | <i>Streptococcus suis</i>             | SC19                                              | rodents                   | blood; brain; lung           |
| DNA mismatch repair protein                                 | 1 | <i>Cryptococcus neoformans</i>        | KN99 $\alpha$                                     | rodents                   | lung; brain                  |
| DNA-binding response regulator                              | 1 | <i>Aeromonas hydrophila</i>           | ZYAH72                                            | bony fishes               |                              |
| putative subunit of V-ATPase                                | 1 | <i>Candida albicans</i>               | SN76                                              | rodents                   |                              |
| 2-keto-3-deoxy-6-phosphogluconate aldolase                  | 1 | <i>Pectobacterium atrosepticum</i>    | SCRI1039                                          | eudicots                  | tuber                        |
| uncharacterized glycosyltransferase                         |   | <i>Erwinia amylovora</i>              | CFBP 1430                                         | eudicots                  | shoot; fruit                 |
| glycosyltransferases                                        | 1 | <i>Streptococcus suis</i>             | SC19                                              | rodents                   | brain; heart; kidney; spleen |
| tryptophan synthase                                         | 2 | <i>Aspergillus fumigatus</i>          | CEA10                                             | lethal pathogen phenotype |                              |
| indole-3-glycerol phosphate synthase                        | 1 | <i>Xanthomonas oryzae</i>             | pv. oryzae strain PXO99A                          | monocots                  | leaf                         |
| anthranilate synthase component II                          | 1 | <i>Xanthomonas campestris</i>         | pv. campestris strain 8004                        | eudicots                  | leaf                         |
| anthranilate synthase component I                           | 1 | <i>Aspergillus fumigatus</i>          | AfS35                                             | rodents                   | lung                         |
| ammonium transporters                                       | 1 | <i>Colletotrichum gloeosporioides</i> | Cg-14                                             | flowering plants          | fruit                        |
| N-acetylneuraminase cytidyltransferase                      | 1 | <i>Vibrio vulnificus</i>              | CMCP6                                             | crustaceans               | napulii                      |
| phenylacetate-coenzyme A ligase                             | 4 | <i>Burkholderia cenocepacia</i>       | K56-2                                             | nematodes                 |                              |
| excinuclease ABC, B subunit                                 | 1 | <i>Streptococcus agalactiae</i>       | group B serotype V strain CNCTC 10/84             | primates                  | blood; blood plasma          |

|                                            |    |                         |                                                              |             |                         |
|--------------------------------------------|----|-------------------------|--------------------------------------------------------------|-------------|-------------------------|
| UDP-xylose synthase                        | 1  | Cryptococcus neoformans | H99                                                          | rodents     |                         |
| glucose/galactose transporter              | 3  | Coxiella burnetii       | RSA 439                                                      | moths       | larva                   |
| cytoplasmic superoxide dismutase           | 2  | Salmonella enterica     | subsp. enterica serovar<br>Typhimurium strain ATCC<br>14028  | moths       |                         |
| Na(+)-translocating NADH-quinone reductase | 12 | Pseudomonas aeruginosa  | PAO1                                                         | moths       | larva                   |
| ECF sigma factor                           | 1  | Pseudomonas syringae    | pv. syringae strain B728a                                    | eudicots    | leaf                    |
| Holliday junction DNA helicase             | 1  | Klebsiella pneumoniae   | NCTC 9633                                                    | nematodes   | larva                   |
| antiporter gene                            | 2  | Escherichia coli        | 536                                                          | rodents     | intestine               |
| quorum sensing                             | 1  | Vibrio harveyi          | BB120                                                        | crustaceans | larva                   |
| catabolite repression control protein      | 2  | Pseudomonas syringae    | pv. tomato strain DC3000                                     | eudicots    | leaf                    |
| divalent metal cation transporter          | 18 | Enterococcus faecalis   | OG1RF                                                        | moths       | larva                   |
| fumarate hydratase class I                 | 6  | Salmonella enterica     | subsp. enterica serovar<br>Typhimurium strain NCTC<br>12023  | rodents     | macrophage              |
| BCAA transporter                           | 2  | Staphylococcus aureus   | USA300                                                       | rodents     | kidney; heart;<br>liver |
| multidrug efflux transporter               | 3  | Vibrio cholerae         | JB58 (Smr ΔlacZ)                                             | rodents     | intestine               |
| pathogenicity island                       | 2  | Salmonella enterica     | subsp. enterica serovar<br>Typhimurium strain NCTC<br>S12023 | rodents     | spleen; liver           |
| putative L-aspartate oxidase               | 2  | Coxiella burnetii       | Nine Mile phase II                                           | primates    | epithelial cell         |
| hypothetical protein                       | 1  | Magnaporthe oryzae      | KJ201                                                        | monocots    |                         |
| glyoxalase A                               | 4  | Listeria monocytogenes  | 10403S                                                       | rodents     | spleen; liver           |
| hydroxylamine reductase                    | 2  | Escherichia coli        | APEC O18                                                     | eukaryotes  |                         |

|                                                            |   |                                   |                                                      |          |                                    |
|------------------------------------------------------------|---|-----------------------------------|------------------------------------------------------|----------|------------------------------------|
| central tRNA-modifying GTPase                              | 2 | <i>Streptococcus suis</i>         | SC19                                                 | rodents  | brain; lung;<br>spleen; blood      |
| ApbE-family protein                                        | 1 | <i>Pseudomonas syringae</i>       | pv. tomato strain DC3000                             | eudicots |                                    |
| leader RNA that functions as a sensor for mn <sup>2+</sup> | 1 | <i>Xanthomonas oryzae</i>         | pv. oryzae strain PXO99A                             | monocots | leaf                               |
| 4-amino-4-deoxy-L-arabinose (Ara4N) production             | 1 | <i>Salmonella enterica</i>        | subsp. enterica serovar<br>Typhimurium strain JSG210 | rodents  | Peyer's gland                      |
| transcription termination factor Rho                       | 2 | <i>Clostridioides difficile</i>   | R20291                                               | rodents  |                                    |
| ferrous iron transport protein                             | 2 | <i>Pseudomonas aeruginosa</i>     | PAO1                                                 | rodents  | lung                               |
| surface-exposed thioredoxin-family lipoprotein             | 1 | <i>Streptococcus pneumoniae</i>   | serotype 2 strain D39                                | rodents  | lung; blood;<br>nasopharynx        |
| protein deacetylase                                        | 1 | <i>Yersinia pestis</i>            | 201                                                  | rodents  |                                    |
| glycosyltransferase                                        | 2 | <i>Helicobacter pylori</i>        | G27                                                  | primates | gastric<br>epithelium<br>cell line |
| UDP-glucose 4-epimerase                                    | 1 | <i>Burkholderia glumae</i>        | BGR1                                                 | monocots | panicle                            |
| histone methyltransferase                                  | 2 | <i>Mycobacterium tuberculosis</i> | H37Rv                                                | primates | macrophage                         |
| effector (plant avirulence determinant)                    | 7 | <i>Pseudomonas cichorii</i>       | JBC1                                                 | eudicots | leaf                               |
| acetyltransferase                                          | 1 | <i>Xanthomonas oryzae</i>         | pv. oryzae strain PXO99A                             | monocots | leaf                               |
| poly-beta-1,6-N-acetyl-D-glucosamine N-deacetylase         |   | <i>Staphylococcus aureus</i>      | JE2                                                  | rodents  | thigh muscle                       |
| regulatory protein                                         | 1 | <i>Pseudomonas aeruginosa</i>     | PAO1                                                 | rodents  |                                    |
| putative beta-glucosidase                                  |   | <i>Botrytis cinerea</i>           | B05.10                                               | eudicots | leaf                               |
| thioredoxin reductase                                      |   | <i>Fusarium graminearum</i>       | PH-1                                                 | monocots | inflorescence<br>; leaf            |
|                                                            |   |                                   |                                                      |          | spleen; bone<br>marrow-            |

|                                                          |   |                                   |                                                   |                           |                    |
|----------------------------------------------------------|---|-----------------------------------|---------------------------------------------------|---------------------------|--------------------|
|                                                          |   |                                   |                                                   |                           | derived macrophage |
| PvdI(2)                                                  |   | <i>Pseudomonas aeruginosa</i>     | PAO1                                              | nematodes                 | larva              |
| global regulator                                         | 1 | <i>Pseudomonas aeruginosa</i>     | PA14                                              | rodents                   | liver; kidney      |
| virulence factor                                         | 1 | <i>Cronobacter turicensis</i>     | LMG 23827                                         | primates                  | THP-1 cell         |
| type III secretion                                       | 1 | <i>Salmonella enterica</i>        | subsp. enterica serovar Typhimurium strain SL1344 | rodents                   |                    |
| putative arylsulfatase                                   | 2 | <i>Salmonella enterica</i>        | subsp. enterica serovar Typhimurium strain 14028s | bony fishes               | embryo             |
| protein-serine/threonine phosphatase                     | 2 | <i>Staphylococcus aureus</i>      | Newman                                            | rodents                   | kidney; liver      |
| eukaryotic-type serine/threonine kinases                 | 2 | <i>Streptococcus suis</i>         | serotype 2                                        | even-toed ungulates       |                    |
| translation initiation factor eIF3                       | 1 | <i>Aspergillus fumigatus</i>      | CEA10                                             | lethal pathogen phenotype |                    |
| transcriptional regulatory protein                       |   | <i>Enterococcus faecalis</i>      | V583                                              | rodents                   | mandible           |
| ferric vibriobactin ABC transporter, ATP-binding protein |   | <i>Klebsiella pneumoniae</i>      | KPPR1                                             | rodents                   | lung; spleen       |
| O-fucosyltransferase                                     |   | <i>Toxoplasma gondii</i>          | CZ1                                               | rodents                   | abdomen; brain     |
| DNA gyrase (bacterial topoisomerase II)                  | 3 | <i>Burkholderia glumae</i>        | Pg-10                                             | monocots                  | seedling           |
| hybrid protein                                           | 1 | <i>Xanthomonas oryzae</i>         | pv. oryzae strain PXO99A                          | monocots                  | leaf               |
| putative transcriptional regulator                       |   | <i>Escherichia coli</i>           | serotype O157:H7                                  | primates                  | epithelial cell    |
| a novel ribosome-associated modulation protein           | 1 | <i>Erwinia amylovora</i>          | Ea1189                                            | eudicots                  | shoot              |
| protein tyrosine kinase transcriptional regulator        | 2 | <i>Mycobacterium tuberculosis</i> | H37Ra                                             | rodents                   | lung               |
| glycosyltransferase family 2 protein                     | 2 | <i>Ralstonia solanacearum</i>     | GMI1000                                           | eudicots                  | seedling           |
| phospho-2-dehydro-3-deoxyheptonate aldolase              | 4 | <i>Ralstonia solanacearum</i>     | OE1-1                                             | eudicots                  | leaf               |



|                                                            |   |                                   |                                                 |          |                                    |
|------------------------------------------------------------|---|-----------------------------------|-------------------------------------------------|----------|------------------------------------|
| 3-oxoacyl-ACP synthase                                     | 2 | <i>Xanthomonas oryzae</i>         | pv. <i>oryzae</i> strain PXO99A                 | monocots | leaf                               |
| acyl carrier protein                                       | 1 | <i>Xanthomonas oryzae</i>         | pv. <i>oryzae</i> strain PXO99A                 | monocots | leaf                               |
| UDP-3-O-[3-hydroxymyristoyl] glucosamine N-acyltransferase | 1 | <i>Leptospira interrogans</i>     | serovar Manilae strain L495                     | rodents  | liver; kidney                      |
| 3-hydroxybutyryl-CoA dehydrogenase                         | 1 | <i>Escherichia coli</i>           | F11                                             | rodents  | small intestine; stomach           |
| involved in pathogenicity                                  | 1 | <i>Glaesserella parasuis</i>      | LC                                              | rodents  | heart; spleen; lung                |
| alpha/beta hydrolase                                       | 2 | <i>Salmonella enterica</i>        | subsp. <i>enterica</i> serovar Typhi strain Ty2 | primates | macrophage                         |
| siderophores synthesis                                     | 2 | <i>Klebsiella pneumoniae</i>      | KPPR1                                           | rodents  | spleen; lung                       |
| protein kinase                                             | 1 | <i>Fusarium graminearum</i>       | PH-1                                            | monocots | spike                              |
| endonuclease                                               | 1 | <i>Fusarium pseudograminearum</i> | WZ2-8A                                          | monocots | leaf                               |
| putative outer membrane protein H                          | 2 | <i>Riemerella anatipestifer</i>   | RA-CH-1                                         | birds    | blood; liver; brain; spleen; heart |
| phosphate metabolism                                       | 2 | <i>Xanthomonas citri</i>          | subsp. <i>citri</i> strain 306                  | eudicots | leaf                               |
| chaperone protein                                          | 4 | <i>Francisella tularensis</i>     | subsp. <i>novicida</i> strain U112              | rodents  | liver; spleen                      |
| type IV secretion protein                                  | 2 | <i>Xanthomonas albilineans</i>    | FS25                                            | monocots | leaf                               |
| DNA-binding transcriptional regulator NtrC                 | 4 | <i>Pseudomonas aeruginosa</i>     | LESB58                                          | rodents  |                                    |
| sensor histidine kinase                                    | 1 | <i>Xanthomonas oryzae</i>         | pv. <i>oryzae</i> strain PXO99                  | monocots | leaf                               |
| multidrug resistance protein                               | 1 | <i>Pseudomonas aeruginosa</i>     | PAO1                                            | rodents  | lung                               |
| beta-lactamase                                             | 3 | <i>Pseudomonas aeruginosa</i>     | PAO1                                            | moths    |                                    |
| putative ompa family outer membrane protein precursor      | 1 | <i>Xanthomonas albilineans</i>    | XaFL07-1                                        | monocots | stem; leaf                         |

|                                          |  |                                   |                                                          |             |                                       |
|------------------------------------------|--|-----------------------------------|----------------------------------------------------------|-------------|---------------------------------------|
| 3-isopropylmalate dehydrogenase          |  | <i>Klebsiella pneumoniae</i>      | KPPR1                                                    | rodents     | lung;<br>bronchoalveolar lavage fluid |
| multidrug efflux protein                 |  | <i>Acinetobacter baumannii</i>    | BM4587                                                   | rodents     | blood; lung;<br>liver; spleen         |
| nucleotide sugar transaminase            |  | <i>Xanthomonas oryzae</i>         | pv. <i>oryzae</i> strain PXO99A                          | monocots    | leaf                                  |
| peroxisomal-CoA synthetase               |  | <i>Magnaporthe oryzae</i>         | Guy11                                                    | monocots    | leaf                                  |
| effector protein                         |  | <i>Escherichia coli</i>           | EDL933                                                   | rodents     | colon                                 |
| glucokinase                              |  | <i>Mycobacterium tuberculosis</i> | H37Rv                                                    | rodents     | spleen; lung                          |
| two-component system, response regulator |  | <i>Pseudomonas syringae</i>       | pv. tomato strain DC3000                                 | eudicots    | leaf                                  |
| phage-shock protein                      |  | <i>Salmonella enterica</i>        | subsp. <i>enterica</i> serovar Typhimurium strain ST4/74 | rodents     | spleen                                |
| alanine racemase                         |  | <i>Aeromonas hydrophila</i>       | HBNUAh01                                                 | bony fishes | abdomen                               |
| aldo/keto reductase                      |  | <i>Beauveria bassiana</i>         | Bb0062                                                   | moths       | larva                                 |
